1 **The emergence of successful *Streptococcus pyogenes* lineages through**  
2 **convergent pathways of capsule loss and recombination directing high**  
3 **toxin expression**

4  
5 **Claire E. Turner<sup>1,2#</sup>, Matthew T. G. Holden<sup>3,4</sup>, Beth Blane<sup>5</sup>, Carlyne Horner<sup>6</sup>, Sharon**  
6 **J. Peacock<sup>5</sup>, Shiranee Sriskandan<sup>2</sup>.**

7 <sup>1</sup>Molecular Biology & Biotechnology, The Florey Institute, University of Sheffield

8 <sup>2</sup>Department of Infectious Diseases, Imperial College London

9 <sup>3</sup>Pathogen Genomics, The Wellcome Trust Sanger Institute, Cambridge, United Kingdom

10 <sup>4</sup> School of Medicine, University of St Andrews, St Andrews, United Kingdom

11 <sup>5</sup>Department of Medicine, University of Cambridge, Cambridge, United Kingdom

12 <sup>6</sup> British Society for Antimicrobial Chemotherapy, Birmingham, United Kingdom

13

14 **Corresponding author:**

15 Dr Claire Turner

16 Molecular Biology & Biotechnology

17 Firth Court

18 Western Bank

19 Sheffield

20 UK

21 S10 2TN

22 [c.e.turner@sheffield.ac.uk](mailto:c.e.turner@sheffield.ac.uk)

23

24

25

26 **Abstract**

27 Gene transfer and homologous recombination in *Streptococcus pyogenes* has the potential to  
28 trigger the emergence of pandemic lineages, as exemplified by lineages of *emm1* and *emm89*  
29 that emerged in the 1980s and 2000s respectively. Although near-identical replacement gene  
30 transfer events in the *nga* (NADase) and *slo* (Streptolysin O) locus conferring high  
31 expression of these toxins underpinned the success of these lineages, extension to other *emm*-  
32 genotype lineages is unreported. The emergent *emm89* lineage was characterised by five  
33 regions of homologous recombination additional to *nga/slo*, including complete loss of the  
34 hyaluronic acid capsule synthesis locus *hasABC*, a genetic trait replicated in two other  
35 leading *emm* types and recapitulated by other *emm* types by inactivating mutations. We  
36 hypothesised that other leading genotypes may have undergone a similar recombination  
37 events. We analysed a longitudinal dataset of genomes from 344 clinical invasive disease  
38 isolates representative of locations across England, dating from 2001 to 2011, and an  
39 international collection of *S. pyogenes* genomes representing 54 different genotypes, and  
40 found frequent evidence of recombination events at the *nga-slo* locus predicted to confer  
41 higher toxin expression. We identified multiple associations between recombination at this  
42 locus and inactivating mutations within *hasA/B*, suggesting convergent evolutionary  
43 pathways in successful genotypes. This included common genotypes *emm28* and *emm87*. The  
44 combination of no or low capsule, and high expression of *nga* and *slo*, may underpin the  
45 success for many emergent *S. pyogenes* lineages of different genotypes, triggering new  
46 pandemics and could change the way *S. pyogenes* causes disease.

47

48 **Importance**

49 *Streptococcus pyogenes* is a genetically diverse pathogen, with over 200 different genotypes  
50 defined by *emm* typing, but only a minority of these genotypes are responsible for majority of  
51 human infection in high income countries. Two prevalent genotypes associated with disease  
52 rose to international dominance following recombination of a toxin locus that conferred  
53 increased expression. Here, we found that recombination of this locus and promoter has  
54 occurred in other diverse genotypes, events that may allow these genotypes to expand in the  
55 population. We identified an association between the loss of hyaluronic acid capsule  
56 synthesis and high toxin expression, which we propose may be associated with an adaptive  
57 advantage. As *S. pyogenes* pathogenesis depends both on capsule and toxin production, new  
58 variants with altered expression may result in abrupt changes in the molecular epidemiology  
59 of this pathogen in the human population over time.

60

## 61 **Introduction**

62 The capacity for the bacterial human pathogen *Streptococcus pyogenes* to undergo genetic  
63 exchange, independent of known bacteriophages or mobile elements, is not well understood,  
64 yet recent evidence suggests it underpins the emergence of successful new variants that  
65 rapidly rise to international dominance. Homologous recombination of a chromosomal region  
66 encompassing the toxin genes *nga* (encoding for NADase), *ifs* (encoding the inhibitor for  
67 NADase) and *slo* (encoding for Streptolysin O), which was dated to have occurred in the  
68 mid-1980s, is thought to have driven the rise of *emm1* to almost global dominance (1). The  
69 homologous recombination event resulted in increased *nga/slo* expression compared to the  
70 previous variant, linked to the gain of a highly active *nga/ifs/slo* promoter in the new *emm1*  
71 variant compared to the previous variant (2).

72 A very similar recombination event was recently identified in the genotype *emm89*. A new  
73 variant of *emm89* sequence type (ST) 101 (also referred to as Clade 3) emerged, having  
74 undergone six regions of predicted homologous recombination compared to its ST101  
75 predecessor (also referred to as Clade 2) (3, 4). One of the six regions encompassed the  
76 *nga/ifs/slo* locus, comprising a region almost identical to *emm1*, that conferred similarly high  
77 expression of *nga* and *slo* compared to the previous variant. Another recombination region  
78 within the emergent ST101 *emm89* resulted in the loss of the hyaluronic acid capsule. We  
79 dated the emergence of this new acapsular, high toxin expressing ST101 *emm89* lineage to  
80 the mid-1990s, but there was a rapid increase and rise to dominance in the UK between 2005-  
81 2010 (3). The lineage is now the dominant form of *emm89* in the UK as well as other parts of  
82 the world including Europe, North America and Japan (4-8).

83 Given that recombination associated with *nga/ifs/slo* can give rise to new successful *S.*  
84 *pyogenes* variants, we hypothesised that this may be a feature common to other successful

85 *emm*-types. To determine if this is the case, we sequenced the genomes of 344 *S. pyogenes*  
86 invasive disease isolates originating from hospitals across England between 2001-2011, and  
87 compared the data with other available historical and contemporary international *S. pyogenes*  
88 whole genome sequence (WGS) data. We identified that recombination of the *nga-ifs-slo*  
89 locus has occurred in other leading *emm*-types, supporting the hypothesis that it can underpin  
90 the emergence and success of new lineages. We also identified an association of *nga-ifs-slo*  
91 recombination towards a high activity promoter variant with inactivating mutations within the  
92 capsule locus. This suggests that loss of capsule may also provide an advantage to certain  
93 genotypes, either through a direct effect on pathogenesis or an association with the process of  
94 recombination.

95

## 96 **Results**

### 97 *Genetic characterisation of bacteraemia isolates*

98 We performed whole genome sequencing of 344 *S. pyogenes* invasive isolates collected from  
99 hospitals across England by the British Society for Antimicrobial Chemotherapy (BSAC)  
100 Bacteraemia Resistance Surveillance Programme during 2001-2011. Forty-four different  
101 *emm*-types were identified from *de novo* assembly, with the most common being *emm1*  
102 (n=64, 18.6%), *emm12* (n=34, 9.9%), *emm89* (n=32, 9.3%), *emm3* (n=28, 8.1%), *emm87* (n=  
103 22, 6.4%) and *emm28* (n=15, 4.4%) (Supplementary Figure 1). Antimicrobial susceptibilities  
104 were typical for *S. pyogenes* with 100% isolates susceptible to penicillin, and 20% resistant to  
105 macrolides; detailed susceptibilities and associated genotypes are reported in Supplementary  
106 Table 1.

107 The phylogenetic distribution of the 344 isolates based on core genome variation revealed  
108 distinct clustering by *emm*-type, each forming single lineages with the exceptions of *emm44*,

109 *emm90* and *emm101*, each of which formed two lineages (Figure 1A). Pairwise distances  
110 between isolates gave a median of just 45 SNPs separating the genomes of isolates of the  
111 same *emm*-genotype (range 0-15,137 SNPs), compared to a median of 15,648 SNPs  
112 separating the genomes of isolates of different *emm*-types (range 5312-18,317 SNPs) (Figure  
113 1B). The genotypes *emm44*, *emm90* and *emm101* gave the highest SNP distance for the intra-  
114 *emm* comparison (13,494 - 15,137 SNPs) which approaches the median level observed  
115 between *emm*-types. This indicated that while other genotypes represent a relatively  
116 conserved chromosomal genetic background, the populations of *emm44*, *emm90* and *emm101*  
117 exhibit more diverse chromosomal backgrounds despite representing the same *emm*-type,  
118 potentially due to *emm* gene switching.

#### 119 *High level of variation within the nga-ifs-slo locus*

120 In order to identify the level of variation within the *nga-ifs-slo* locus we extracted the  
121 sequence from the 3' end of *nusG* (immediately upstream of *nga*) to the 3' end of *slo* (*P-nga-*  
122 *ifs-slo*), comprising the entire locus and all upstream sequence including the predicted ~67bp  
123 *nga/ifs/slo* promoter region (9). We constructed a phylogenetic tree from SNPs within *P-nga-*  
124 *ifs-slo* region and compared it to the phylogeny constructed with SNPs extracted from a  
125 whole genome comparison to a reference *emm89* genome, H293 (Figure 2). In most cases, a  
126 single unique *P-nga-ifs-slo* variant was associated with each *emm* genotype, consistent with a  
127 conserved chromosome. The main exception to this was the *P-nga-ifs-slo* variant found in  
128 modern (post 1980s MIT1) *emm1*, which was also found in all *emm12*, all *emm22* (a lineage  
129 known to be acapsular), and 11 of the 32 *emm89* isolates. These 11 *emm89* represented the  
130 emergent acapsular ST101 variant, whilst the remaining 21 *emm89* isolates represented the  
131 original encapsulated ST101 variant, with a different unique *P-nga-ifs-slo* as previously  
132 reported (3). The entire *emm75* population and one of the two *emm76* isolates were  
133 associated with a *P-nga-ifs-slo* variant that was closely related to the *emm1*-like variant. All

134 but two *emm87* isolates had a P-*nga-ifs-slo* variant also found in the acapsular lineage *emm4*  
135 (Figure 2). The presence of multiple P-*nga-ifs-slo* variants within single *emm* genotypes,  
136 where the core chromosome was otherwise relatively conserved, indicated that gene transfer  
137 and recombination are responsible for the variation rather than extensive genome-wide  
138 divergence or *emm* ‘switching’.

139

#### 140 *Variants of the nga-ifs-slo promoter associated with altered expression*

141 Recombination of P-*nga-ifs-slo* and surrounding regions in *emm1* and *emm89* conferred  
142 higher activity and expression of NGA and SLO (1, 3, 10). This change in expression was  
143 linked to the combination of three key residues at -27, -22 and -18 within the *nga-ifs-slo*  
144 promoter. A<sub>-27</sub>G<sub>-22</sub>T<sub>-18</sub> at these key sites was associated with high *nga-ifs-slo* promoter  
145 activity in *emm1* and emergent *emm89* following recombination (also referred to as Pnga3)  
146 compared to low promoter activity of historical *emm1* and *emm89*, associated with the key  
147 site combinations A<sub>-27</sub>T<sub>-22</sub>C<sub>-18</sub> and G<sub>-27</sub>T<sub>-22</sub>T<sub>-18</sub> respectively (2) (Figure 3A). We compared the  
148 ~67bp *nga-ifs-slo* promoter region of the 344 BSAC collection isolate genomes to identify  
149 different variants. We expanded the data analysed by including assembled genome data from  
150 over 5000 isolates representing 54 different *emm* types: from Cambridge University Hospital  
151 (CUH) (11), the rest of England and Wales collected by Public Health England (PHE) in  
152 2014/2015 (PHE-2014/15) (12, 13) and from the USA collected by the Active Bacterial Core  
153 Surveillance System (ABCs) in 2015 (ABCs-2015) (14). We excluded 39 *emm*-types  
154 represented by fewer than 3 isolates (Supplementary Table 2).

155 Four combinations of the -27, -22 and -18 residues were found across all 5271 isolates (Table  
156 1); variant 1 A<sub>-27</sub>T<sub>-22</sub>C<sub>-18</sub> and variant 2 G<sub>-27</sub>T<sub>-22</sub>T<sub>-18</sub> are associated with low promoter activity,  
157 while variant 3 A<sub>-27</sub>G<sub>-22</sub>T<sub>-18</sub> and variant 4 A<sub>-27</sub>T<sub>-22</sub>T<sub>-18</sub> are associated with high promoter

158 activity. We also identified subtypes of the 67bp promoter region which varied at bases other  
159 than -27, -22 and -18 (Figure 3A and B, Table 1). A<sub>-27</sub>T<sub>-22</sub>C<sub>-18</sub> variant subtype 1.1 and G<sub>-27</sub>T<sub>-22</sub>T<sub>-18</sub>  
160 variant subtype 2.1 have both previously been confirmed to have low promoter activity  
161 (2) and were the most common variants found across genotypes. Other subtypes of these  
162 variants were restricted to single genotypes except G<sub>-27</sub>T<sub>-22</sub>T<sub>-18</sub> variant subtype 2.2, which  
163 differed by a single substitution of C for a T residue at -40bp. Two subtypes of the high  
164 activity variant A<sub>-27</sub>G<sub>-22</sub>T<sub>-18</sub> were found, the most common being subtype 3.1 associated with  
165 *emm1* and emergent *emm89*, and subtype 3.2 which was found predominantly in the genomes  
166 of *emm4* and *emm87* and which differed from subtype 3.1 by a single substitution of G for T  
167 at -40bp. We measured the activity of NADase in the culture supernatant of strains  
168 representing different promoter subtypes and predict that the presence of T/G/C at -40bp does  
169 not affect activity of the promoter (Supplementary Figure 3). The fourth promoter variant, A<sub>-27</sub>T<sub>-22</sub>T<sub>-18</sub>  
170 is also associated with high activity (15) and was identified in the genomes of  
171 *emm28*, *emm75* and all *emm78*. Only three *emm*-types were exclusively associated with the  
172 high activity promoter variant A<sub>-27</sub>G<sub>-22</sub>T<sub>-18</sub>; *emm1*, *emm3* and *emm12*. Other *emm*-types with  
173 the high activity promoter variant also had one or more of the other three promoter variants,  
174 suggesting a mixed population or, as in the case of *emm89*, an evolving population.

175 To identify any possible recombination events surrounding the P-*nga-ifs-slo* region, we  
176 generated a maximum likelihood phylogeny based on SNPs within the P-*nga-ifs-slo* (Figure  
177 4). This identified several more instances where more than one variant was associated with a  
178 single genotype and a cluster of variants with high activity associated promoter residues A<sub>-27</sub>G<sub>-22</sub>T<sub>-18</sub>.

180 We sought evidence for acquisition of the high activity-associated promoter A<sub>-27</sub>G<sub>-22</sub>T<sub>-18</sub>  
181 variant by *emm* genotypes where the dominant or ancestral state was a low activity-associated  
182 promoter; these included, in addition to the aforementioned *emm89*: *emm75*, *emm76*, *emm77*,



183 *emm81*, *emm82*, *emm87*, *emm94* and *emm108*, all of which are *emm* types frequently  
184 identified in the UK and the USA (12-14). Although one *emm28* was found to carry the high  
185 activity-associated promoter, the rest of the *emm28* population was divided between either A-  
186 <sub>27</sub>T-<sub>22</sub>C-<sub>18</sub> or A-<sub>27</sub>T-<sub>22</sub>T-<sub>18</sub> variants. The data pointed to a switch in *P-nga-ifs-slo* in all cases  
187 rather than an *emm* switch, except for *emm82*, where the *emm82* gene has replaced the  
188 *emm12* gene in an *emm12* genetic background (14).

189 *High level of mutations within the capsule locus leading to truncations of HasA or HasB*

190 As well as recombination around the *P-nga-ifs-slo* region, the emergent ST101 variant of  
191 *emm89* had also undergone recombination surrounding the *hasABC* locus, and, in place of the  
192 *hasABC* genes, was a region of 156bp that was not found in genotypes with the capsule locus  
193 but is found in the acapsular *emm4* and *emm22* isolates (3). To identify any similar events in  
194 other genotypes, we examined the sequences of *hasA*, *hasB*, and *hasC* in the assemblies of  
195 isolates from the BSAC collection as well as CUH (11), PHE-2014/15 and ABCs-2015  
196 collections for gene presence as well as premature stop codon mutations or missing genes  
197 (Figure 5). The *hasABC* locus was absent in the majority of *emm89* isolates, consistent with  
198 the previous observations describing the recent emergence of the acapsular *emm89* variant  
199 (3). Similarly, the *hasABC* genes were absent in all *emm4* and *emm22* isolates, as previously  
200 identified (16), except for two *emm4* isolates and one *emm22* isolate which had an intact  
201 *hasABC* locus predicted to encode full length proteins. We confirmed the genotypes of these  
202 isolates by *emm*-typing the assembled genomes; MLST and phylogenetic analysis indicated  
203 they both had a very different genetic background to other *emm4* or *emm22* populations  
204 suggesting these were not typical of these *emm* types, and therefore they represent examples  
205 of *emm* switching. Interestingly, we also identified a similar replacement of *hasABC* for the  
206 156bp region in one *emm28* isolate (PHE-2014/15, GASEMM1261 (13)), but phylogenetic  
207 analysis suggested this was highly divergent to the rest of the *emm28* population, likely to

208 represent another example of *emm* switching. Isolated examples of individual *hasA* or *hasB*  
209 gene loss were identified in the genomes of isolates belonging to *emm1* (n=1), *emm3* (n=1),  
210 *emm11* (n=1), *emm12* (n=4) and *emm108* (n=2).

211 The majority of genotypes (n=35/54, 65%) had isolates without genes or truncation mutations  
212 in at least one of *hasABC* genes. In some cases, a consistent mutation could be identified  
213 across the genotype (Figure 5). Mutations in *hasC* were rare and only detected in one isolate,  
214 an *emm77* which also had a mutation within *hasA*. Within seven of the eight *emm*-types for  
215 which we identified potential *P-nga-ifs-slo* recombination, a high percentage of isolates had  
216 inactivating mutations *hasA* and *hasB* suggesting a possible association between an acapsular  
217 and recombination of *P-nga-ifs-slo*.

#### 218 *Recombination of P-nga-ifs-slo and surrounding regions*

219 To confirm our prediction that genotypes *emm28*, *emm75*, *emm76*, *emm77*, *emm81*, *emm87*,  
220 *emm94* and *emm108* had undergone recombination around *P-nga-ifs-slo*, we mapped all the  
221 genome sequence data for each genotype to the *emm89* reference genome H293. Gubbins  
222 analysis of SNP clustering predicted regions of recombination spanning the *nga-ifs-slo* region  
223 and varying in length in all eight genotypes (Figure 6). To analyse recombination of these  
224 genotypes and potential capsule loss further, we studied the population structure of each  
225 genotype individually.

#### 226 *Recombination within emm28 and emm87 around P-nga-ifs-slo and the capsule locus*

227 The genotypes *emm28* and *emm87* were the sixth and fifth most common in the BSAC  
228 collection, and *emm28* has previously been noted to be a major cause of infection in high  
229 income countries (17). We focussed attention on *emm28* and *emm87* as there has been little  
230 genomic work on these genotypes so far.

231 All BSAC *emm28* isolates carried the A<sub>-27</sub>T<sub>-22</sub>C<sub>-18</sub> low activity associated promoter but  
232 inclusion of international genomic data identified A<sub>-27</sub>T<sub>-22</sub>T<sub>-18</sub> variant carrying isolates. These  
233 two promoter variants were associated with different major lineages within the entire  
234 population of 378 international *emm28* isolates, including one newly sequenced English  
235 isolate originally isolated in 1938. The majority of isolates (n=374) clustered either with the  
236 reference MGAS6180 strain (USA) (18) or with the reference MEW123 strain (USA) (19)  
237 (Figure 7A). Gubbins analysis for core SNP clustering predicted that the two lineages were  
238 distinguished by a single 28,200bp region of recombination, between positions 142,426bp  
239 (*ntpE*, M28\_Spy0126) and 170,625bp (M28\_Spy0153) of the MGAS6180 chromosome. This  
240 suggests the emergence of one lineage from the other through a single recombination event,  
241 followed by expansion of both lineages (Figure 7B). Within the recombination region was the  
242 *P-nga-ifs-slo* locus, which differed between the two lineages; although unique in the  
243 MGAS6180-like lineage and with low activity associated promoter residues A<sub>-27</sub>T<sub>-22</sub>C<sub>-18</sub>, the  
244 MEW123-like lineage had a *P-nga-ifs-slo* identical to that found in *emm78* isolates (Figure  
245 4), with the three key residues of A<sub>-27</sub>T<sub>-22</sub>T<sub>-18</sub>. This is supported by recent findings identifying  
246 two main lineages within *emm28* and that the A<sub>-27</sub>T<sub>-22</sub>T<sub>-18</sub> promoter variant conferred greater  
247 toxin expression than A<sub>-27</sub>T<sub>-22</sub>C<sub>-18</sub> (15).

248 Although we identified an A<sub>-27</sub>G<sub>-22</sub>T<sub>-18</sub> high activity variant of *P-nga-ifs-slo* within *emm28*,  
249 this was only associated with the highly divergent GASEMM1261 isolate that may represent  
250 an *emm* switching event. This isolate, along with three other PHE-2014/15 isolates  
251 (GASEMM2648, GASEMM1396 and GASEMM1353) also representing highly divergent  
252 lineages, were excluded from the phylogenetic analysis.

253 All *emm28* isolates, regardless of lineage and including MGAS6180 (originally isolated in  
254 the 1990s), had the same insertion mutation within *hasA* of an A residue after 219 bp. This  
255 insertion was predicted to lead to a frameshift and a premature stop codon after 72 amino

256 acids (aa) instead of full length 420 aa, rendering *hasA* a pseudogene. Some isolates also had  
257 additional mutations in *hasA*; a deletion of a A residue in a septa-A tract leading to a  
258 frameshift and a stop codon after 7 aa (n=1); a deletion of a T residue in a septa-T tract  
259 leading to a frameshift and a stop codon after 15 aa (n=2); an insertion of a A residue after 57  
260 bp leading to a frameshift and a stop codon after 46 aa (n=3). The loss of full length HasA  
261 would render the isolates acapsular.

262 In *emm28* there were just two exceptions where *hasA* found to be intact: the historical *emm28*  
263 isolate from 1938 had an intact *hasABC* capsule operon; and BSAC\_bs2099, which appeared  
264 to have undergone recombination to acquire a 22,316bp region surrounding the *hasABC*  
265 genes, that was 99% identical to the same region in *emm2* isolate MGAS10270, suggesting  
266 *emm2* might be the donor for this recombination. Both isolates were predicted to express full  
267 length HasA and synthesise capsule. Taken together, in comparison with the oldest *emm28*  
268 isolate, the data showed that post 1930s *emm28* isolates became acapsular through mutation,  
269 but the contemporary population is divided into two major lineages, MEW123-like and  
270 MGAS6180-like lineages, that may differ in *nga-ifs-slo* expression. Additionally, there was  
271 evidence of geographical structure in the population: the MEW123-like lineage comprised  
272 mainly of North American isolates (39/44) and only five from England/Wales; isolates from  
273 Australia, France and Lebanon were MGAS6180-like, along with the rest of the  
274 England/Wales isolates.

275 Phylogenetic analysis of the BSAC *emm87* population was expanded and compared with  
276 publicly available *emm87* genome sequence data, totalling 173 isolates from the UK and  
277 North America, including one historical NCTC UK isolate from ~1970-80 (NCTC12065).  
278 Gubbins analysis predicted a single 20,506bp region of recombination surrounding the P-*nga-*  
279 *ifs-slo* region, that distinguished the main population from the oldest BSAC isolates from  
280 2001 and the historical 1970-80 NCTC isolate (Figure 7C). Whilst the two 2001 BSAC

281 isolates and the NCTC isolate had a P-*nga-ifs-slo* variant with low activity-associated  
282 promoter residues, G<sub>27</sub>T-<sub>22</sub>T-<sub>18</sub>, all other *emm87* isolates had a P-*nga-ifs-slo* region with high  
283 activity associated promoter residues, A-<sub>27</sub>G-<sub>22</sub>T-<sub>18</sub>, identical to that found in *emm4* and some  
284 *emm77*. This suggested the emergence of a new lineage through a single recombination event  
285 followed by expansion within the population, redolent of that previously observed in *emm89*  
286 (Figure 7D).

287 Similar to *emm28*, all *emm87* isolates, bar four had an insertion of an A residue after 57 bp  
288 that resulted in a frameshift mutation in *hasA*, and the introduction of a premature stop codon  
289 after 46aa of HasA. This mutation was also identified within the historical NCTC isolate, but  
290 was not found in the two 2001 BSAC isolates, that had an intact *hasABC* locus. This mutation  
291 was also absent in two PHE-2014/15 isolates that had undergone an additional recombination  
292 event (32,243bp) surrounding the *hasABC* locus, although, as this region shared 100% DNA  
293 identity to *emm28* isolate MGAS6180, HasA is truncated. Overall the data showed that, like  
294 *emm89*, contemporary *emm87* are acapsular with a high activity *nga-ifs-slo* promoter,  
295 suggesting that this *emm* lineage may have recently shifted towards this genotype/phenotype.

#### 296 *Recombination within different multi-locus sequence types of emm75*

297 The *emm75* genotype is of interest as a common cause of non-invasive infection in the UK; it  
298 is also used in models of nasopharyngeal infection (20, 21). Eleven *emm75* isolates were  
299 present in the BSAC collection, all multilocus sequence type (ST) 150. When we  
300 incorporated other available genome sequence data for *emm75* (n=173), including two newly  
301 sequenced historical *emm75* isolates from 1937 and 1938, two major lineages were identified,  
302 characterised by two different MLSTs; ST49 or ST150 (Figure 8A). Although the two  
303 historic English isolates were ST49, like the majority of modern North American isolates, the  
304 modern England/Wales isolates were predominantly ST150.

305 Although these two ST lineages differed in the *P-nga-ifs-slo* region there was a high level of  
306 predicted recombination across the genomes of both STs, perhaps indicative of historic *emm*  
307 switching or extensive genetic exchange. ST49 isolates had the subtype 1.1 low activity A-  
308 <sub>27</sub>T-<sub>22</sub>C-<sub>18</sub> promoter, whereas all ST150 isolates had the A-<sub>27</sub>G-<sub>22</sub>T-<sub>18</sub> subtype 3.1 high activity  
309 promoter variant, identical to that of *emm1/emm89* (Figure 4). Modern ST49 isolates did,  
310 however, differ from historic 1930s isolates by ten distinct regions of predicted  
311 recombination (Figure 8B), including a region spanning the *nga-ifs-slo* locus, although this  
312 did not include the promoter region. We did not detect any mutations affecting the capsule  
313 region in *emm75*. Taken together, *emm75* was characterised by two major MLST lineages  
314 differing in *P-nga/ifs/slo* promoter activity genotypes but without evidence of recent  
315 recombination or loss of capsule.

316 *Lineages associated with recombination in emm76, emm77 and emm81.*

317 The phylogeny of all available genome data for *emm76*, *emm77* and *emm81* confirmed the  
318 presence of diverse lineages, associated with different MLSTs (Figure 9). In all genotypes,  
319 however, there was a dominant MLST lineage representing the majority of isolates; ST50  
320 *emm76*, ST63 *emm77* and ST624 *emm81*. Within the dominant MLST lineages of *emm76* and  
321 *emm77*, there were sub-lineages that were associated with different *P-nga-ifs-slo* variants as  
322 well as loss of functional HasA through mutation.

323 We identified five different MLSTs within *emm76*, but the majority of isolates (30/38)  
324 belonged to ST50, including both BSAC isolates. Recombination analysis of the ST50  
325 lineage identified a sub-lineage that differed from other ST50 isolates by 19 regions of  
326 recombination (Supplementary Figure 3). One of these regions encompassed *P-nga-ifs-slo*,  
327 conferring a *P-nga-ifs-slo* variant closely related to that of modern *emm1* and *emm89* with an  
328 identical high activity promoter (subtype 3.1). This sub-lineage was dominated by PHE-

2014/15 isolates and also contained the more recent of the two BSAC isolates (2008). All isolates in this sub-lineage also had a nonsense mutation within *hasA* of a C to T change at 646bp, resulting in a premature stop codon after 215aa, likely to render the isolates acapsular. Only one ST50 isolate outside this sub-lineage had the same *hasA* C646T change. All other *emm76* isolates would express full length HasA. This suggests the mutation in *hasA* occurred prior to the recombination events.

Two sub-lineages were also identified within the dominant *emm77* lineage ST63, and one was associated with the high activity cluster *P-nga-ifs-slo* variant, compared to predicted low activity variants found in the other *emm77* lineages. Recombination analysis predicted only two regions of recombination distinguishing the two sub-lineages; a region of 17,954bp surrounding *P-nga-ifs-slo*, and a 173bp region within a hypothetical gene (SPYH293\_00394) (Supplementary Figure 4). Whilst all BSAC *emm77* isolates (years 2001-2009) were ST63 with low activity *P-nga-ifs-slo*, PHE isolates from 2014-2015 were almost evenly divided between the two sub-lineages, indicating a potential recent change in England/Wales. All ST63 isolates except three, had a deletion of a T residue within a septa-polyT tract at 458bp in *hasA*, predicted to truncate the HasA protein after 154aa. The three exceptions were predicted to encode full length HasA and were associated with low *P-nga-ifs-slo* promoter activity variants. Although also not associated with high *P-nga-ifs-slo* promoter activity variants, other lineages of *emm77* also carried mutations within *hasA* that would truncate HasA; ST399 isolates carried an insertion of a T residue at 71 bp of the *hasA* gene resulting in a premature stop codon after 46 aa, and two ST133 isolates carried G894A substitution resulting in a premature stop codon after amino acid residue 297.

The *emm81* population (n=68) was more diverse with nine different sequence types, but the majority of isolates (41/68) were ST624 or the single locus variant ST837 (9/68; one SNP in *recP* allele) within the same lineage (Figure 9). ST171 was restricted to three historical

354 isolates originally collected in 1938-1939. We did not detect any *hasABC* variations that  
355 would disrupt translation in *emm81* lineages except for the dominant group of ST624/ST837,  
356 where we identified an A residue insertion at 128 bp in *hasB* resulting in a frameshift and  
357 premature stop codon after 50 aa. All ST624/ST837 carried the high activity cluster P-*nga-*  
358 *ifs-slo* variant identical to that seen in *emm3*, compared to all other lineages associated with  
359 other low activity P-*nga-ifs-slo* variants. Recombination analysis identified extensive  
360 recombination had occurred within *emm81* leading to the different levels of diversity, but we  
361 identified one region of recombination that distinguished in the ST624/ST837 lineage  
362 compared to the closely related ST909 and ST117 populations (Supplementary Figure 5).  
363 This region surrounded the P-*nga-ifs-slo* locus, suggesting ST624/ST837 gained the high  
364 activity cluster P- *nga-ifs-slo* variant through recombination, like other *emm*-types,  
365 potentially from *emm3* (Figure 4). The prevalence of the high activity and truncated HasB  
366 ST624/ST837 lineage may be a recent event in England/Wales, as all BSAC isolates prior to  
367 2009 were outside of this lineage.

368 *High activity cluster P-nga-ifs-slo variants gained by recombination in emm94 and emm108*

369 Within *emm94*, we identified a P-*nga-ifs-slo* identical to that found in *emm1* with high  
370 activity promoter variant subtype 3.1. Phylogenetic analysis of 51 *emm94* isolates identified a  
371 dominant lineage among England/Wales isolates separate to the single USA isolate and two  
372 England/Wales isolates (Supplementary Figure 6), that belonged to ST89. Gubbins analysis  
373 predicted 11 regions of recombination in all lineage isolates compared to the three outlying  
374 isolates, including one (22,648bp) that encompassed P-*nga-ifs-slo*, transferring a high activity  
375 A-27G-22T-18 P-*nga-ifs-slo* variant. All *emm94* isolates contained an indel within *hasB*  
376 compared to the reference (H293); losing 6bp and gaining 13bp between 127-133bp. This  
377 variation causes a frameshift and would truncate the HasB protein after 45aa.



378 We identified a similar high activity cluster P- *nga-ifs-slo* variant within a single *emm108*  
379 genome originating from the USA. Within the 9 isolates from PHE-2014/15 (n=7) and  
380 ABCs-2015 (n=2), there were two sequence types, ST1088 and ST14. ST14 was represented  
381 by the only two ABCs-2015 isolates and we identified that both had lost the entire *hasB* gene,  
382 although *hasA* and *hasC* were still present (Supplementary Figure 7). Additionally, one of the  
383 ABCs-2015 isolates had undergone recombination of a single ~29,683bp region surrounding  
384 the P-*nga-ifs-slo*, replacing P-*nga-ifs-slo* for one identical to that found in *emm3* with high  
385 activity promoter variant A<sub>-27</sub>G<sub>-22</sub>T<sub>-18</sub> subtype 3.1.

386

## 387 Discussion

388 The emergence of new, internationally successful lineages of *S. pyogenes* can be driven by  
389 recombination-related genome remodelling, as demonstrated by *emm1* and *emm89*. The  
390 transfer of a P-*nga-ifs-slo* region conferring increased expression to the new variant was  
391 common to both genotypes. In the case of *emm89*, five other regions of recombination were  
392 identified in the emergent variant, one resulting in the loss of the hyaluronic acid capsule.  
393 Although potentially all six regions of recombination combined underpinned the success of  
394 the emergent *emm89*, we have shown here that recombination of P-*nga-ifs-slo* has occurred in  
395 other leading *emm*-types as well as a high frequency of capsule loss through mutation. These  
396 data point to an association between genetic change affecting capsule and recombination  
397 affecting the P-*nga-ifs-slo* locus, conferring increased production of *nga-ifs-slo*; in some  
398 cases (notably *emm87*, *emm89*, and *emm94*) this has further been associated with an apparent  
399 fitness advantage and expansion within the population.

400 A number of genotypes were found to be associated with multiple variants of P-*nga-ifs-slo*.

401 The majority of genotypes had P-*nga-ifs-slo* variants with the low activity promoter

402 associated three key residues variants: G<sub>-27</sub>T<sub>-22</sub>T<sub>-18</sub> or A<sub>-27</sub>T<sub>-22</sub>C<sub>-18</sub>. Only *emm1*, *emm3* and  
403 *emm12* were exclusively associated with the high activity A<sub>-27</sub>G<sub>-22</sub>T<sub>-18</sub> variant. We have  
404 shown that the same high activity promoter variant is present in isolates belonging to twelve  
405 other *emm* types, notably, *emm76*, *emm77*, *emm81*, *emm87* and *emm94*, although this is not a  
406 consistent feature in these genotypes due to *emm*-switching or recombination. We identified  
407 four combination of the three key promoter residues and several subtypes of the 67bp  
408 promoter that varied in bases other than those at the -27, -22, and -18 key positions. Although  
409 some subtypes were restricted to single genotypes, variation in the -40 base led to the subtype  
410 2.2 of G<sub>-27</sub>T<sub>-22</sub>T<sub>-18</sub> and subtype 3.2 of A<sub>-27</sub>G<sub>-22</sub>T<sub>-18</sub>. We measured the activity of NADase in  
411 representative strains and genotypes of these promoter variants and variation in the -40 base  
412 did not impact on the activity conferred by the -27, -22, and -18 bases. Although we predicted  
413 the level of *nga* and *slo* expression based on the promoter variant, this may not relate to  
414 actual expression given the level of other genetic variation between genotypes. However, our  
415 consistent findings of lineages emerging following acquisition of the high activity promoter  
416 variant supports the hypothesis that this confers some benefit that may relate to increased  
417 toxin expression.

418 Intriguingly, where we identified an acquisition of the high activity promoter variant through  
419 recombination, these genotypes also had a genetic change in the capsule locus, likely  
420 rendering the organism unable to make capsule (*hasA* mutation) or only low levels of capsule  
421 (*hasB* mutation). To date, only *emm4*, *emm22*, and the emergent *emm89* lineage are known to  
422 lack all three genes required to synthesise capsule. Here, we identified mutations that would  
423 truncate HasA and HasB in 35% of all isolates and 65% (35/54) of all genotypes. As the  
424 majority of isolates included in this study were invasive or sterile site isolates, the findings  
425 further challenge the dogma that the hyaluronan capsule is required for full virulence of *S.*  
426 *pyogenes* and, in addition, lend credence to the possibility that the increased expression of

427 NADase and SLO may in some way compensate for the lack of capsule (22). While capsule  
428 has been shown to underpin resistance to opsonophagocytic killing in the most constitutively  
429 hyper-encapsulated genotypes such as *emm18* (23, 24), there is less evidence that it  
430 contributes measurably to opsonophagocytosis killing resistance in other genotypes (3).  
431 Whether loss of capsule synthesis is of benefit to *S. pyogenes* is uncertain; the capsule may  
432 shield several key adhesins used for interaction with host epithelium and fomites, but may  
433 also act as a barrier to transformation with DNA. An accumulation of *hasABC* inactivating  
434 mutations have been identified during long term carriage (25) and, although for some  
435 genotypes capsule loss impacted on survival in whole human blood, a high number of  
436 acapsular *hasA* mutants have also recently been found to be causing a high level of disease in  
437 children, including *emm1*, *emm3* and *emm12* (26).

438 The process of recombination in *S. pyogenes* is not well understood and natural competence  
439 has only been demonstrated once and under conditions of biofilm or nasopharyngeal infection  
440 (27). We do not know if the six regions of recombination that lead to the emergence of the  
441 new ST101 *emm89* variant occurred simultaneously, although no intermediate isolates have  
442 been identified. The loss of the hyaluronic acid capsule in the new emergent *emm89*, along  
443 with our consistent findings of inactivating mutations associated with P-*nga-ifs-slo* transfer  
444 indicate either 1) the process of recombination requires the inactivation of capsule, 2) capsule  
445 negative *S. pyogenes* requires high expression of *nga-ifs-slo* for survival, 3) or that capsule  
446 negative phenotype combined with high expression of *nga-ifs-slo* provides a greater selective  
447 advantage to *S. pyogenes*.

448 The phylogeny of *emm28*, *emm87*, *emm76*, *emm77*, *emm94*, and *emm108* indicated that  
449 mutations in *hasA* or *hasB* occurred prior to recombination of P-*nga-ifs-slo*, supporting the  
450 first hypothesis that prior capsule inactivation is required for recombination. There is no  
451 evidence, however, to suggest this was required for recombination in the *emm1* population. It

452 could be hypothesised that capsule acts as a barrier to genetic exchange, but there has also  
453 been a positive genetic association of capsule to recombination rates (28). A positive  
454 association may, however, be related only to species expressing antigenic capsule whereby  
455 recombination is required to introduce variation for immune escape.

456 The *hasC* gene is not essential for capsule synthesis (29) because a paralog of *hasC* exists  
457 within the *S. pyogenes* genome. A paralog for *hasB* (*hasB.2*) also exists elsewhere in the *S.*  
458 *pyogenes* chromosome and can act in the absence of *hasB* to produce low levels capsule (30)  
459 but *hasA* is absolutely essential for capsule synthesis (29). The mutations in *hasA* in *emm28*  
460 and *emm87* have been previously noted and confirmed to render the isolates acapsular (26,  
461 31). Not all acapsular isolates were found to carry the high activity promoter of *nga-ifs-slo*,  
462 despite being invasive, perhaps refuting the hypothesis that high activity *nga-ifs-slo* promoter  
463 is essential for the survival of acapsular *S. pyogenes*.

464 Interestingly, we identified that the capsule locus is also a target for recombination as, like  
465 *emm89*, isolates within *emm28* and *emm87* had undergone recombination of this locus and  
466 surrounding regions, varying in length (Supplementary Figure 8) and restoring capsule  
467 synthesis in *emm28*. Isolated examples of loss of *hasA* or *hasB* genes were identified in some  
468 genotypes, such as *emm108*, possibly due to internal recombination and deletion.

469 Only two *emm4* and one *emm22* isolates were found to have P-*nga-ifs-slo* variants that were  
470 not an A<sub>-27</sub>T<sub>-22</sub>G<sub>-18</sub> high activity promoter variants, and interestingly these isolates carried the  
471 *hasABC* genes, typically absent in *emm4* and *emm22*. The high genetic distance of these  
472 isolates to the other *emm4* and *emm22* genomes indicated potentially *emm* switching of the  
473 *emm4* or *emm22* genes onto different genetic backgrounds. The single *emm28* with a high  
474 activity P-*nga-ifs-slo* variant also may be an example of this, and was one of four *emm28*  
475 isolates that did not cluster with the two main *emm28* lineages. Although we excluded them

476 from our analysis as we focussed on recombination within the two main lineages, this  
477 potential for highly diverse variants within genotypes and the potential for *emm*-switching  
478 warrants further investigation, particularly as the most promising current vaccine is multi-  
479 valent towards common M types (32).

480 All other genotypes carrying the high activity P-*nga-ifs-slo* variant were found to have  
481 undergone recombination of this region; *emm28*, *emm75*, *emm76*, *emm77*, *emm81*, *emm87*,  
482 *emm94* and *emm108*, as well as the previously described *emm1* and *emm89*.

483 Within *emm87*, we identified three isolates outside of the main population lineage that  
484 represented the oldest isolates in the collection; two from 2001 (different geographical  
485 locations within England) and one from ~1970-80. A single region of recombination,  
486 surrounding the P-*nga-ifs-slo* locus distinguished the main population lineage from the three  
487 older isolates, consistent with a recombination event but, due to a lack of earlier isolates of  
488 *emm87*, we could not confirm a recombination related shift in the population, as reported  
489 previously for *emm89* and *emm1*.

490 The existence of two lineages within the contemporary *emm28* suggests that one has not yet  
491 displaced the other, although the MEW123-like lineage was predominantly USA isolates,  
492 consistent with recent findings (15). The P-*nga-ifs-slo* region with the high activity associated  
493 A-<sub>27</sub>T-<sub>22</sub>T-<sub>18</sub> and acquired through recombination by the MEW123-like lineage was identical  
494 to that found in *emm78*, indicating *emm78* as the potential genetic donor. We found *emm78* to  
495 have high levels of NADase activity, as predicted, and interestingly, like *emm28*, all eight  
496 *emm78* isolates were acapsular due to a deletion within the *hasABC* promoter region  
497 extending into *hasA*. This again may support the hypothesis that capsule negative *S. pyogenes*  
498 requires high expression of *nga-ifs-slo* for survival.

499 A strength of this study was the systematic longitudinal sampling over a 10 year period; as  
500 expected, this again identified the shift in the *emm89* population. Other *emm*-types exhibited  
501 lineages with different *P-nga-ifs-slo* variants, and those with the more active promoter variant  
502 did appear to become dominant over time, similar to *emm1* and the emergent *emm89*  
503 lineages. For example, the high activity *P-nga-ifs-slo* ST63 lineage of *emm77* was not  
504 detected in England/Wales isolates prior to 2014-15. Similarly, the high activity *P-nga-ifs-slo*  
505 variant *emm81* ST646/ST837 lineage was represented by only a single isolate (of six)  
506 collected 2001-2009 but became dominant by 2014/15 in England/Wales and the USA.  
507 *emm75* was the 6<sup>th</sup> most common genotype in England/Wales 2014-15 and dominated by  
508 high activity *P-nga-ifs-slo* variant ST150 lineage, yet less common in the USA where ST49  
509 with low activity *P-nga-ifs-slo* is dominant. A high prevalence of *emm94* was also found in  
510 England/Wales 2014-15 but was rare in the USA (only 1 isolate). Our analysis of this  
511 genotype indicated there has been a recombination related change in the population as we  
512 detected 11 regions of predicted recombination including *P-nga-ifs-slo* potentially conferring  
513 high toxin expression. The other ten regions of recombination may also provide advantages to  
514 this lineage along with a potential low level of capsule through *hasB* mutation.

515 The development and boosting of circulating antibodies to SLO is often used as a diagnostic  
516 biomarker of recent *S. pyogenes* infection and is known to be more specific to throat rather  
517 than skin infections. The genomic analysis provides explanation for this historic and well-  
518 recognized association between anti- SLO titres and disease patterns, due to known tissue  
519 tropism of *S. pyogenes emm* types. Whether the alteration of SLO activity in different *S.*  
520 *pyogenes* strains might render such a test more or less specific will be of interest, although  
521 may explain observed differences in ASO titre between genotypes (33). There is also the  
522 possibility that other beta haemolytic streptococci might acquire similarly active SLO  
523 production, reducing the specificity of ASO titre to *S. pyogenes*.

524 Our genomic analysis has uncovered convergent evolutionary pathways towards capsule loss  
525 and recombination related re-modelling of the P-*nga-ifs-slo* locus in leading contemporary  
526 genotypes. This suggests that a combination of capsule loss and gain of high *nga-ifs-slo*  
527 expression provides a greater selective advantage than either of these phenotypes alone.  
528 Acquisition of the high activity promoter led to pandemic *emm1* and *emm89* clones that are  
529 dominant and highly successful. Active surveillance of the lineages comprising *emm76*,  
530 *emm77*, *emm81*, *emm87*, *emm94* and *emm108* is required to determine if capsule  
531 loss/reduction and recombination of P-*nga-ifs-slo* towards high expression will trigger  
532 expansion towards additional pandemic clones in the next few years.

## 533 **Materials & Methods**

### 534 **Isolates**

535 344 isolates of *S. pyogenes* associated with blood stream infections and submitted to the  
536 British Society for Antimicrobial Chemotherapy (BSAC, [www.bsacsurv.org](http://www.bsacsurv.org)) from 11  
537 different sites across the UK between 2001-2011 were subjected to whole genome  
538 sequencing (Supplementary Table 1). All BSAC isolates were tested for antibiotic  
539 susceptibility using the BSAC agar dilution method to determine MICs (34).

540 A further six isolates were sequenced from a historical collection of *S. pyogenes* originally  
541 collected in the 1930s from puerperal sepsis patients at Queen Charlottes Hospital, London,  
542 UK; one *emm28* from 1938 (ERR485803), two *emm75* from 1937 (ERR485807) and 1939  
543 (ERR485820), three *emm81* from 1938 (ERR485805) and 1939 (ERR485801, ERR485802).

### 544 **Genome sequencing**

545 Streptococcal DNA was extracted using the QIAextractor instrument according to the  
546 manufacturer's instructions (QIAGEN, Hilden, Germany), or manually using a phenol-  
547 chloroform method (35). DNA library preparation was conducted according to the

548 Illumina protocol and sequencing was performed on an Illumina HiSeq 2000 with 100-  
549 cycle paired-end runs. Sequence data have been submitted to the European Nucleotide  
550 Archive (ENA) ([www.ebi.ac.uk/ena](http://www.ebi.ac.uk/ena)) (accession numbers in Supplementary Table 2).  
551 Genomes were *de novo* assembled using Velvet with the pipeline and improvements found  
552 at <https://github.com/sanger-pathogens/vr-codebase> and [https://github.com/sanger-](https://github.com/sanger-pathogens/assembly_improvement)  
553 [pathogens/assembly\\_improvement](https://github.com/sanger-pathogens/assembly_improvement) (36). Annotation was performed using Prokka. *emm*  
554 genotypes were determined from the assemblies and multilocus sequence types (MLSTs)  
555 were identified using the MLST database ([pubmlst.org/spyogenes](http://pubmlst.org/spyogenes)) and an in-house script  
556 ([https://github.com/sanger-pathogens/mlst\\_check](https://github.com/sanger-pathogens/mlst_check)). New MLST were submitted to the  
557 database (<https://pubmlst.org/>). Antimicrobial resistance genes were identified by srst2  
558 (37) using the ARG-ANNOT database (ARGannot\_r2.fasta) (38).

### 559 **Genome sequence analysis**

560 Sequence reads were mapped using SMALT (<https://www.sanger.ac.uk/science/tools/smalt>)  
561 to the completed *emm89* reference genome H293 (3) as this genome contains no known  
562 prophage regions. Other reference genomes were also used where indicated with predicted  
563 prophage regions (Supplementary Table 3) excluded to obtain ‘core’ SNPs. Maximum-  
564 likelihood phylogenetic trees were generated from aligned core SNPs using RAxML (39)  
565 with the GTR substitution model (39) and 100 bootstraps. Regions of recombination were  
566 predicted using Gubbins analysis using the default parameters (40).

567 Other genome sequence data were obtained from the short read archive. We combined data  
568 collected across England and Wales through Public Health England during 2014 and 2015  
569 (PHE-2014/15) supplied by Kapatai *et al.* (13) and Chalker *et al.* (12) from invasive and non-  
570 invasive *S. pyogenes* isolates. We also used data supplied by Chochua *et al.* (14) collected by  
571 Active Bacterial Core Surveillance USA in 2015 (ABCs-2015) from invasive *S. pyogenes*



572 isolates. ABCs-2015 sequence data was pre-processed by Trimmomatic (41) to remove  
573 adapters and low quality sequences. PHE-2014/15 had already been pre-processed (12, 13).  
574 Genome data from these collections were assembled *de novo* using Velvet (assembly  
575 statistics provided in Supplementary Table 2) and any isolates with atypical total assembled  
576 length or contig numbers were excluded. We also used data from Turner *et al.* (2017) of  
577 invasive and non-invasive isolates from the Cambridgeshire region, UK and collected  
578 through Cambridge University Hospital (CUH) (11). We relied on the *emm*-type determined  
579 during the original studies and excluded any data where the *emm*-type was uncertain or  
580 negative. The genes *hasA*, *hasB*, *hasC* and the *P-nga-ifs-slo* were extracted from the  
581 assembled genome using *in silico* PCR ([https://github.com/simonrharris/in\\_silico\\_pcr](https://github.com/simonrharris/in_silico_pcr)).  
582 Capsule locus and *P-nga-ifs-slo* variants were also confirmed through mapping.

### 583 **NADase activity**

584 Activity of NADase was measured in culture supernatant as previously described (3).  
585 Activity was determined as the highest dilution capable of hydrolysing NAD<sup>+</sup>.

### 586 **Conflict of interest**

587 SJP is a consultant to Specific and Next Gen Diagnostics.

### 588 **Acknowledgments**

589 This publication presents independent research supported by the Health Innovation Challenge  
590 Fund (WT098600, HICF-T5-342), a parallel funding partnership between the Department of  
591 Health and Wellcome Trust. The work was also funded by the UK Clinical Research  
592 Collaboration (UKCRC, National centre for Infection Prevention & Management) and the  
593 National Institute for Health Research Biomedical Research Centre awarded to Imperial  
594 College London. The views expressed in this publication are those of the author(s) and not  
595 necessarily those of the Department of Health, NIHR, or Wellcome Trust. CET was an

596 Imperial College Junior Research Fellow and is a Royal Society & Wellcome Trust Sir Henry

597 Dale Fellow (208765/Z/17/Z).

598

599

## 600 References

- 601 1. **Nasser W, Beres SB, Olsen RJ, Dean MA, Rice KA, Long SW, Kristinsson KG,**  
602 **Gottfredsson M, Vuopio J, Raisanen K, Caugant DA, Steinbakk M, Low DE,**  
603 **McGeer A, Darenberg J, Henriques-Normark B, Van Beneden CA, Hoffmann S,**  
604 **Musser JM.** 2014. Evolutionary pathway to increased virulence and epidemic group A  
605 *Streptococcus* disease derived from 3,615 genome sequences. *Proc Natl Acad Sci U S*  
606 *A* **111**:E1768-1776.
- 607 2. **Zhu L, Olsen RJ, Nasser W, Beres SB, Vuopio J, Kristinsson KG, Gottfredsson**  
608 **M, Porter AR, DeLeo FR, Musser JM.** 2015. A molecular trigger for intercontinental  
609 epidemics of group A *Streptococcus*. *J Clin Invest* **125**:3545-3559.
- 610 3. **Turner CE, Abbott J, Lamagni T, Holden MT, David S, Jones MD, Game L,**  
611 **Efstratiou A, Sriskandan S.** 2015. Emergence of a new highly successful acapsular  
612 group A *Streptococcus* clade of genotype *emm89* in the United Kingdom. *MBio*  
613 **6**:e00622.
- 614 4. **Zhu L, Olsen RJ, Nasser W, de la Riva Morales I, Musser JM.** 2015. Trading  
615 capsule for increased cytotoxin production: contribution to virulence of a newly  
616 emerged clade of *emm89 Streptococcus pyogenes*. *MBio* **6**:e01378-01315.
- 617 5. **Beres SB, Olsen RJ, Ojeda Saavedra M, Ure R, Reynolds A, Lindsay DSJ, Smith**  
618 **AJ, Musser JM.** 2017. Genome sequence analysis of *emm89 Streptococcus pyogenes*  
619 strains causing infections in Scotland, 2010-2016. *J Med Microbiol* **66**:1765-1773.
- 620 6. **Friaes A, Machado MP, Pato C, Carrico J, Melo-Cristino J, Ramirez M.** 2015.  
621 Emergence of the same successful clade among distinct populations of *emm89*  
622 *Streptococcus pyogenes* in multiple geographic regions. *MBio* **6**:e01780-01715.
- 623 7. **Latronico F, Nasser W, Puhakainen K, Ollgren J, Hyyrylainen HL, Beres SB,**  
624 **Lyytikainen O, Jalava J, Musser JM, Vuopio J.** 2016. Genomic characteristics

- 625 behind the spread of bacteremic group A *Streptococcus* Type *emm89* in Finland, 2004-  
626 2014. *J Infect Dis* **214**:1987-1995.
- 627 8. **Hasegawa T, Hata N, Matsui H, Isaka M, Tatsuno I.** 2017. Characterisation of  
628 clinically isolated *Streptococcus pyogenes* from balanoposthitis patients, with special  
629 emphasis on *emm89* isolates. *J Med Microbiol* **66**:511-516.
- 630 9. **Kimoto H, Fujii Y, Yokota Y, Taketo A.** 2005. Molecular characterization of  
631 NADase-streptolysin O operon of hemolytic streptococci. *Biochim Biophys Acta*  
632 **1681**:134-149.
- 633 10. **Sumby P, Porcella SF, Madrigal AG, Barbian KD, Virtaneva K, Ricklefs SM,**  
634 **Sturdevant DE, Graham MR, Vuopio-Varkila J, Hoe NP, Musser JM.** 2005.  
635 Evolutionary origin and emergence of a highly successful clone of serotype M1 group  
636 A *Streptococcus* involved multiple horizontal gene transfer events. *J Infect Dis*  
637 **192**:771-782.
- 638 11. **Turner CE, Bedford L, Brown NM, Judge K, Torok ME, Parkhill J, Peacock SJ.**  
639 2017. Community outbreaks of group A *Streptococcus* revealed by genome sequencing.  
640 *Sci Rep* **7**:8554.
- 641 12. **Chalker V, Jironkin A, Coelho J, Al-Shahib A, Platt S, Kapatai G, Daniel R,**  
642 **Dhami C, Laranjeira M, Chambers T, Guy R, Lamagni T, Harrison T, Chand M,**  
643 **Johnson AP, Underwood A, Scarlet Fever Incident Management T.** 2017. Genome  
644 analysis following a national increase in Scarlet Fever in England 2014. *BMC Genomics*  
645 **18**:224.
- 646 13. **Kapatai G, Coelho J, Platt S, Chalker VJ.** 2017. Whole genome sequencing of group  
647 A *Streptococcus*: development and evaluation of an automated pipeline for *emm*gene  
648 typing. *PeerJ* **5**:e3226.

- 649 14. **Chochua S, Metcalf BJ, Li Z, Rivers J, Mathis S, Jackson D, Gertz RE, Jr.,**  
650 **Srinivasan V, Lynfield R, Van Beneden C, McGee L, Beall B.** 2017. Population and  
651 whole genome sequence based characterization of invasive group A streptococci  
652 recovered in the United States during 2015. *MBio* **8**.
- 653 15. **Kachroo P, Eraso JM, Beres SB, Olsen RJ, Zhu L, Nasser W, Bernard PE, Cantu**  
654 **CC, Saavedra MO, Arredondo MJ, Strobe B, Do H, Kumaraswami M, Vuopio J,**  
655 **Grondahl-Yli-Hannuksela K, Kristinsson KG, Gottfredsson M, Pesonen M,**  
656 **Pensar J, Davenport ER, Clark AG, Corander J, Caugant DA, Gaini S,**  
657 **Magnussen MD, Kubiak SL, Nguyen HAT, Long SW, Porter AR, DeLeo FR,**  
658 **Musser JM.** 2019. Integrated analysis of population genomics, transcriptomics and  
659 virulence provides novel insights into *Streptococcus pyogenes* pathogenesis. *Nat Genet*  
660 **51:548-559**.
- 661 16. **Flores AR, Jewell BE, Fittipaldi N, Beres SB, Musser JM.** 2012. Human disease  
662 isolates of serotype m4 and m22 group A *Streptococcus* lack genes required for  
663 hyaluronic acid capsule biosynthesis. *MBio* **3:e00413-00412**.
- 664 17. **Steer AC, Law I, Matatolu L, Beall BW, Carapetis JR.** 2009. Global *emm* type  
665 distribution of group A streptococci: systematic review and implications for vaccine  
666 development. *Lancet Infect Dis* **9:611-616**.
- 667 18. **Green NM, Zhang S, Porcella SF, Nagiec MJ, Barbian KD, Beres SB, LeFebvre**  
668 **RB, Musser JM.** 2005. Genome sequence of a serotype M28 strain of group A  
669 *Streptococcus*: potential new insights into puerperal sepsis and bacterial disease  
670 specificity. *J Infect Dis* **192:760-770**.
- 671 19. **Jacob KM, Spilker T, LiPuma JJ, Dawid SR, Watson ME, Jr.** 2016. Complete  
672 genome sequence of *emm28* type *Streptococcus pyogenes* MEW123, a Streptomycin-

- 673 Resistant derivative of a clinical throat isolate suitable for investigation of pathogenesis.  
674 *Genome Announc* **4**.
- 675 20. **Alam FM, Turner CE, Smith K, Wiles S, Sriskandan S.** 2013. Inactivation of the  
676 CovR/S virulence regulator impairs infection in an improved murine model of  
677 *Streptococcus pyogenes* naso-pharyngeal infection. *PLoS One* **8**:e61655.
- 678 21. **Oslowicki J, Azzopardi KI, McIntyre L, Rivera-Hernandez T, Ong CY, Baker C,**  
679 **Gillen CM, Walker MJ, Smeesters PR, Davies MR, Steer AC.** 2019. A controlled  
680 human infection model of group A *Streptococcus* pharyngitis: Which Strain and Why?  
681 *mSphere* **4**.
- 682 22. **Sierig G, Cywes C, Wessels MR, Ashbaugh CD.** 2003. Cytotoxic effects of  
683 streptolysin O and streptolysin S enhance the virulence of poorly encapsulated group A  
684 streptococci. *Infect Immun* **71**:446-455.
- 685 23. **Lynskey NN, Goulding D, Gierula M, Turner CE, Dougan G, Edwards RJ,**  
686 **Sriskandan S.** 2013. RocA truncation underpins hyper-encapsulation, carriage  
687 longevity and transmissibility of serotype M18 group A streptococci. *PLoS Pathog*  
688 **9**:e1003842.
- 689 24. **Moses AE, Wessels MR, Zalcman K, Alberti S, Natanson-Yaron S, Menes T,**  
690 **Hanski E.** 1997. Relative contributions of hyaluronic acid capsule and M protein to  
691 virulence in a mucoid strain of the group A *Streptococcus*. *Infect Immun* **65**:64-71.
- 692 25. **Flores AR, Jewell BE, Olsen RJ, Shelburne SA, 3rd, Fittipaldi N, Beres SB,**  
693 **Musser JM.** 2014. Asymptomatic carriage of group A *Streptococcus* is associated with  
694 elimination of capsule production. *Infect Immun* **82**:3958-3967.
- 695 26. **Flores AR, Chase McNeil J, Shah B, Van Beneden C, Shelburne SA, 3rd.** 2018.  
696 Capsule-negative *emm* types are an increasing cause of pediatric group A streptococcal

- 697 infections at a large pediatric hospital in Texas. *J Pediatric Infect Dis Soc*  
698 doi:10.1093/jpids/piy053.
- 699 27. **Marks LR, Mashburn-Warren L, Federle MJ, Hakansson AP.** 2014. *Streptococcus*  
700 *pyogenes* biofilm growth in vitro and in vivo and its role in colonization, virulence, and  
701 genetic exchange. *J Infect Dis* **210**:25-34.
- 702 28. **Rendueles O, de Sousa JAM, Bernheim A, Touchon M, Rocha EPC.** 2018. Genetic  
703 exchanges are more frequent in bacteria encoding capsules. *PLoS Genet* **14**:e1007862.
- 704 29. **Ashbaugh CD, Alberti S, Wessels MR.** 1998. Molecular analysis of the capsule gene  
705 region of group A *Streptococcus*: the *hasAB* genes are sufficient for capsule expression.  
706 *J Bacteriol* **180**:4955-4959.
- 707 30. **Cole JN, Aziz RK, Kuipers K, Timmer AM, Nizet V, van Sorge NM.** 2012. A  
708 conserved UDP-glucose dehydrogenase encoded outside the *hasABC* operon  
709 contributes to capsule biogenesis in group A *Streptococcus*. *J Bacteriol* **194**:6154-6161.
- 710 31. **Tagini F, Aubert B, Troillet N, Pillonel T, Praz G, Crisinel PA, Prod'hom G, Asner**  
711 **S, Greub G.** 2017. Importance of whole genome sequencing for the assessment of  
712 outbreaks in diagnostic laboratories: analysis of a case series of invasive *Streptococcus*  
713 *pyogenes* infections. *Eur J Clin Microbiol Infect Dis* **36**:1173-1180.
- 714 32. **Steer AC, Carapetis JR, Dale JB, Fraser JD, Good MF, Guilherme L, Moreland**  
715 **NJ, Mulholland EK, Schodel F, Smeesters PR.** 2016. Status of research and  
716 development of vaccines for *Streptococcus pyogenes*. *Vaccine* **34**:2953-2958.
- 717 33. **Johnson DR, Kurlan R, Leckman J, Kaplan EL.** 2010. The human immune response  
718 to streptococcal extracellular antigens: clinical, diagnostic, and potential pathogenetic  
719 implications. *Clin Infect Dis* **50**:481-490.

- 720 34. **Reynolds R, Hope R, Williams L, Surveillance BWPoR.** 2008. Survey, laboratory  
721 and statistical methods for the BSAC Resistance Surveillance Programmes. *J*  
722 *Antimicrob Chemother* **62 Suppl 2**:ii15-28.
- 723 35. **Pospiech A, Neumann B.** 1995. A versatile quick-prep of genomic DNA from gram-  
724 positive bacteria. *Trends Genet* **11**:217-218.
- 725 36. **Page AJ, De Silva N, Hunt M, Quail MA, Parkhill J, Harris SR, Otto TD, Keane**  
726 **JA.** 2016. Robust high-throughput prokaryote de novo assembly and improvement  
727 pipeline for Illumina data. *Microb Genom* **2**:e000083.
- 728 37. **Inouye M, Dashnow H, Raven LA, Schultz MB, Pope BJ, Tomita T, Zobel J, Holt**  
729 **KE.** 2014. SRST2: Rapid genomic surveillance for public health and hospital  
730 microbiology labs. *Genome Med* **6**:90.
- 731 38. **Gupta SK, Padmanabhan BR, Diene SM, Lopez-Rojas R, Kempf M, Landraud L,**  
732 **Rolain JM.** 2014. ARG-ANNOT, a new bioinformatic tool to discover antibiotic  
733 resistance genes in bacterial genomes. *Antimicrob Agents Chemother* **58**:212-220.
- 734 39. **Stamatakis A.** 2014. RAxML version 8: a tool for phylogenetic analysis and post-  
735 analysis of large phylogenies. *Bioinformatics* **30**:1312-1313.
- 736 40. **Croucher NJ, Page AJ, Connor TR, Delaney AJ, Keane JA, Bentley SD, Parkhill**  
737 **J, Harris SR.** 2015. Rapid phylogenetic analysis of large samples of recombinant  
738 bacterial whole genome sequences using Gubbins. *Nucleic Acids Res* **43**:e15.
- 739 41. **Bolger AM, Lohse M, Usadel B.** 2014. Trimmomatic: a flexible trimmer for Illumina  
740 sequence data. *Bioinformatics* **30**:2114-2120.
- 741 42. **Athey TB, Teatero S, Li A, Marchand-Austin A, Beall BW, Fittipaldi N.** 2014.  
742 Deriving group A *Streptococcus* typing information from short-read whole-genome  
743 sequencing data. *J Clin Microbiol* **52**:1871-1876.



- 744 43. **Long SW, Kachroo P, Musser JM, Olsen RJ.** 2017. Whole-Genome sequencing of a  
745 human clinical isolate of *emm28 Streptococcus pyogenes* causing necrotizing fasciitis  
746 acquired contemporaneously with Hurricane Harvey. *Genome Announc* **5**.
- 747 44. **Ibrahim J, Eisen JA, Jospin G, Coil DA, Khazen G, Tokajian S.** 2016. Genome  
748 analysis of *Streptococcus pyogenes* associated with pharyngitis and skin infections.  
749 *PLoS One* **11**:e0168177.
- 750 45. **Ben Zakour NL, Venturini C, Beatson SA, Walker MJ.** 2012. Analysis of a  
751 *Streptococcus pyogenes* puerperal sepsis cluster by use of whole-genome sequencing.  
752 *J Clin Microbiol* **50**:2224-2228.
- 753 46. **de Andrade Barboza S, Meygret A, Vincent P, Moullec S, Soriano N, Lagente V,**  
754 **Minet J, Kayal S, Faili A.** 2015. Complete Genome Sequence of Noninvasive  
755 *Streptococcus pyogenes* M/*emm28* Strain STAB10015, Isolated from a Child with  
756 Perianal Dermatitis in French Brittany. *Genome Announc* **3**.
- 757 47. **Longo M, De Jode M, Plainvert C, Weckel A, Hua A, Chateau A, Glaser P, Poyart**  
758 **C, Fouet A.** 2015. Complete Genome Sequence of *Streptococcus pyogenes emm28*  
759 Clinical Isolate M28PF1, Responsible for a Puerperal Fever. *Genome Announc* **3**.
- 760 48. **Athey TB, Teatero S, Sieswerda LE, Gubbay JB, Marchand-Austin A, Li A,**  
761 **Wasserscheid J, Dewar K, McGeer A, Williams D, Fittipaldi N.** 2016. High  
762 Incidence of Invasive Group A *Streptococcus* Disease Caused by Strains of Uncommon  
763 *emm* Types in Thunder Bay, Ontario, Canada. *J Clin Microbiol* **54**:83-92.
- 764 49. **Flores AR, Luna RA, Runge JK, Shelburne SA, 3rd, Baker CJ.** 2017. Cluster of  
765 Fatal Group A streptococcal *emm87* infections in a single family: molecular basis for  
766 invasion and transmission. *J Infect Dis* **215**:1648-1652.
- 767 50. **Rocheffort A, Boukthir S, Moullec S, Meygret A, Adnani Y, Lavenier D, Faili A,**  
768 **Kayal S.** 2017. Full sequencing and genomic analysis of three *emm75* group A

769            *Streptococcus* strains recovered in the course of an epidemiological shift in French  
770            Brittany. *Genome Announc* **5**.

771

772

773 **Tables**

774 **Table 1. Three key residue variants within the *nga-ifs-slo* promoter**

| Promoter variant | Type | Genotype (% of isolates)                                                                                                                                                                                                                                                                                                                                                                                                                                                                                      |
|------------------|------|---------------------------------------------------------------------------------------------------------------------------------------------------------------------------------------------------------------------------------------------------------------------------------------------------------------------------------------------------------------------------------------------------------------------------------------------------------------------------------------------------------------|
| A-27T-22C-18     | 1.1  | <b>4 (1)*</b> , 8 (100), <b>9 (92)</b> , 11 (100), <b>22 (3)</b> , <b>25 (33)</b> , <b>28 (87.7)</b> , 33 (100), 41 (100), 43 (100), <b>44 (9)</b> , 49 (100), 53 (100), <b>58 (15)</b> , 60 (100), 63 (100), <b>75 (9)</b> , <b>76 (41)</b> , <b>77 (29)</b> , <b>81 (23)</b> , <b>82 (1)</b> , <b>88 (33)</b> , <b>89 (1)</b> , <b>90 (4)</b> , 92 (100), <b>94 (6)</b> , 101 (100), <b>102 (50)</b> , <b>103 (17)</b> , 106 (100), <b>108 (89)</b> , 110 (100), 113 (100), 151 (100), 168 (100), 232 (100) |
|                  | 1.2  | 9(8)                                                                                                                                                                                                                                                                                                                                                                                                                                                                                                          |
|                  | 1.3  | 88(67)                                                                                                                                                                                                                                                                                                                                                                                                                                                                                                        |
| G-27T-22T-18     | 2.1  | 5 (100), 6 (100), 18 (100), <b>25 (67)</b> , <b>44 (28)</b> , 68 (100), <b>75 (1)</b> , <b>76 (5)</b> , <b>77 (1)</b> , <b>82 (1)</b> , <b>87 (2)</b> , <b>89 (6)</b> , <b>90 (96)</b> , 91 (100), <b>102 (50)</b> , <b>103 (83)</b> , 104 (100), 118 (100)                                                                                                                                                                                                                                                   |
|                  | 2.2  | 2 (100), 27 (100), <b>44 (62)</b> , <b>58 (85)</b> , 59 (100), 73 (100), <b>76 (11)</b> , <b>77 (36)</b> , <b>82 (89)</b> , 83 (100)                                                                                                                                                                                                                                                                                                                                                                          |
|                  | 2.3  | 32 (100)                                                                                                                                                                                                                                                                                                                                                                                                                                                                                                      |
| A-27G-22T-18     | 3.1  | 1(100), 3 (100), 12 (100), <b>22 (97)</b> , <b>75 (90)</b> , <b>76 (43)</b> , <b>81 (77)</b> , <b>82 (9)</b> , <b>89 (93)</b> , <b>94 (94)</b> , <b>108 (11)</b>                                                                                                                                                                                                                                                                                                                                              |
|                  | 3.2  | <b>4 (99)</b> , <b>28 (0.3)</b> , <b>77 (34)</b> , <b>87 (98)</b>                                                                                                                                                                                                                                                                                                                                                                                                                                             |
| A-27T-22T-18     | 4    | <b>28 (12)</b> , 78 (100)                                                                                                                                                                                                                                                                                                                                                                                                                                                                                     |

775 \* genotypes in bold have more than one variant within the population

776

777

778 **Figures**

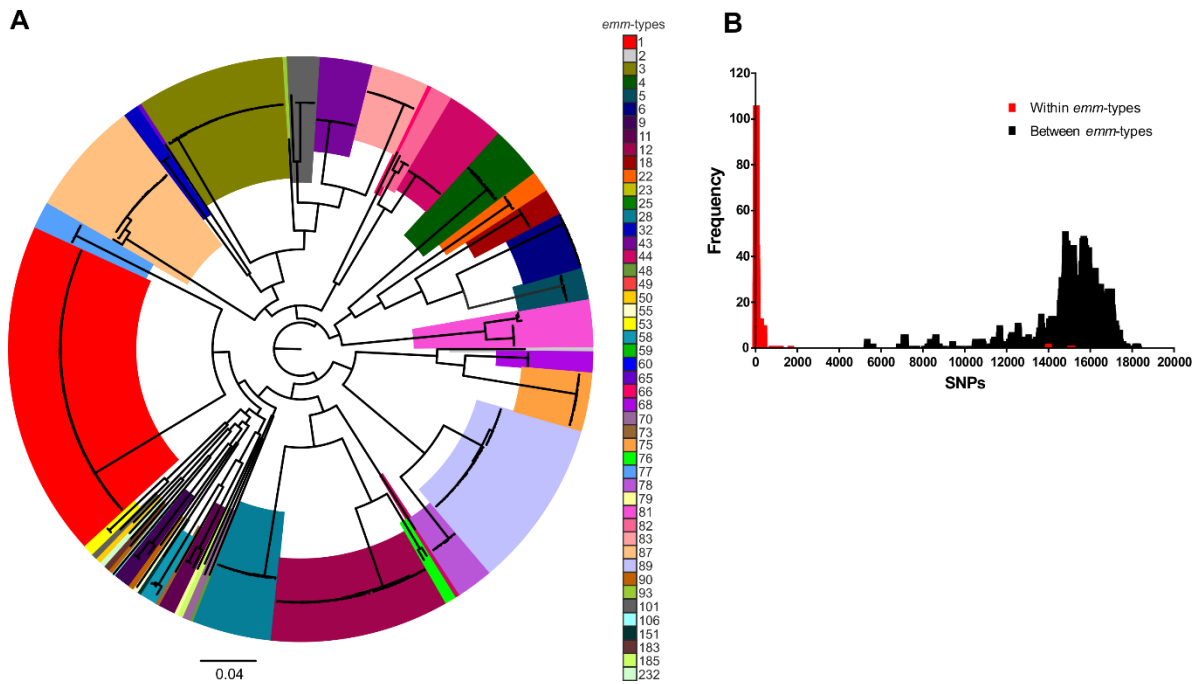

779

780 **Figure 1. Low diversity within *emm* genotypes.** (A) A maximum likelihood phylogenetic  
781 tree constructed from core SNPs extracted after mapping all 344 BSAC isolates to the  
782 complete reference strain H293, identified that the majority of isolates cluster by *emm*  
783 genotype. Exceptions were *emm44*, *emm90* and *emm101*, each of which were present as two  
784 separate lineages. (B) As reflected by the phylogenetic tree, the number of SNPs separating  
785 isolates was high (>5000) when the genomes of isolates of different *emm*-types were  
786 compared (black bars). This was much lower when comparisons were made between the  
787 genomes of isolates of the same *emm*-type (red bars).

788

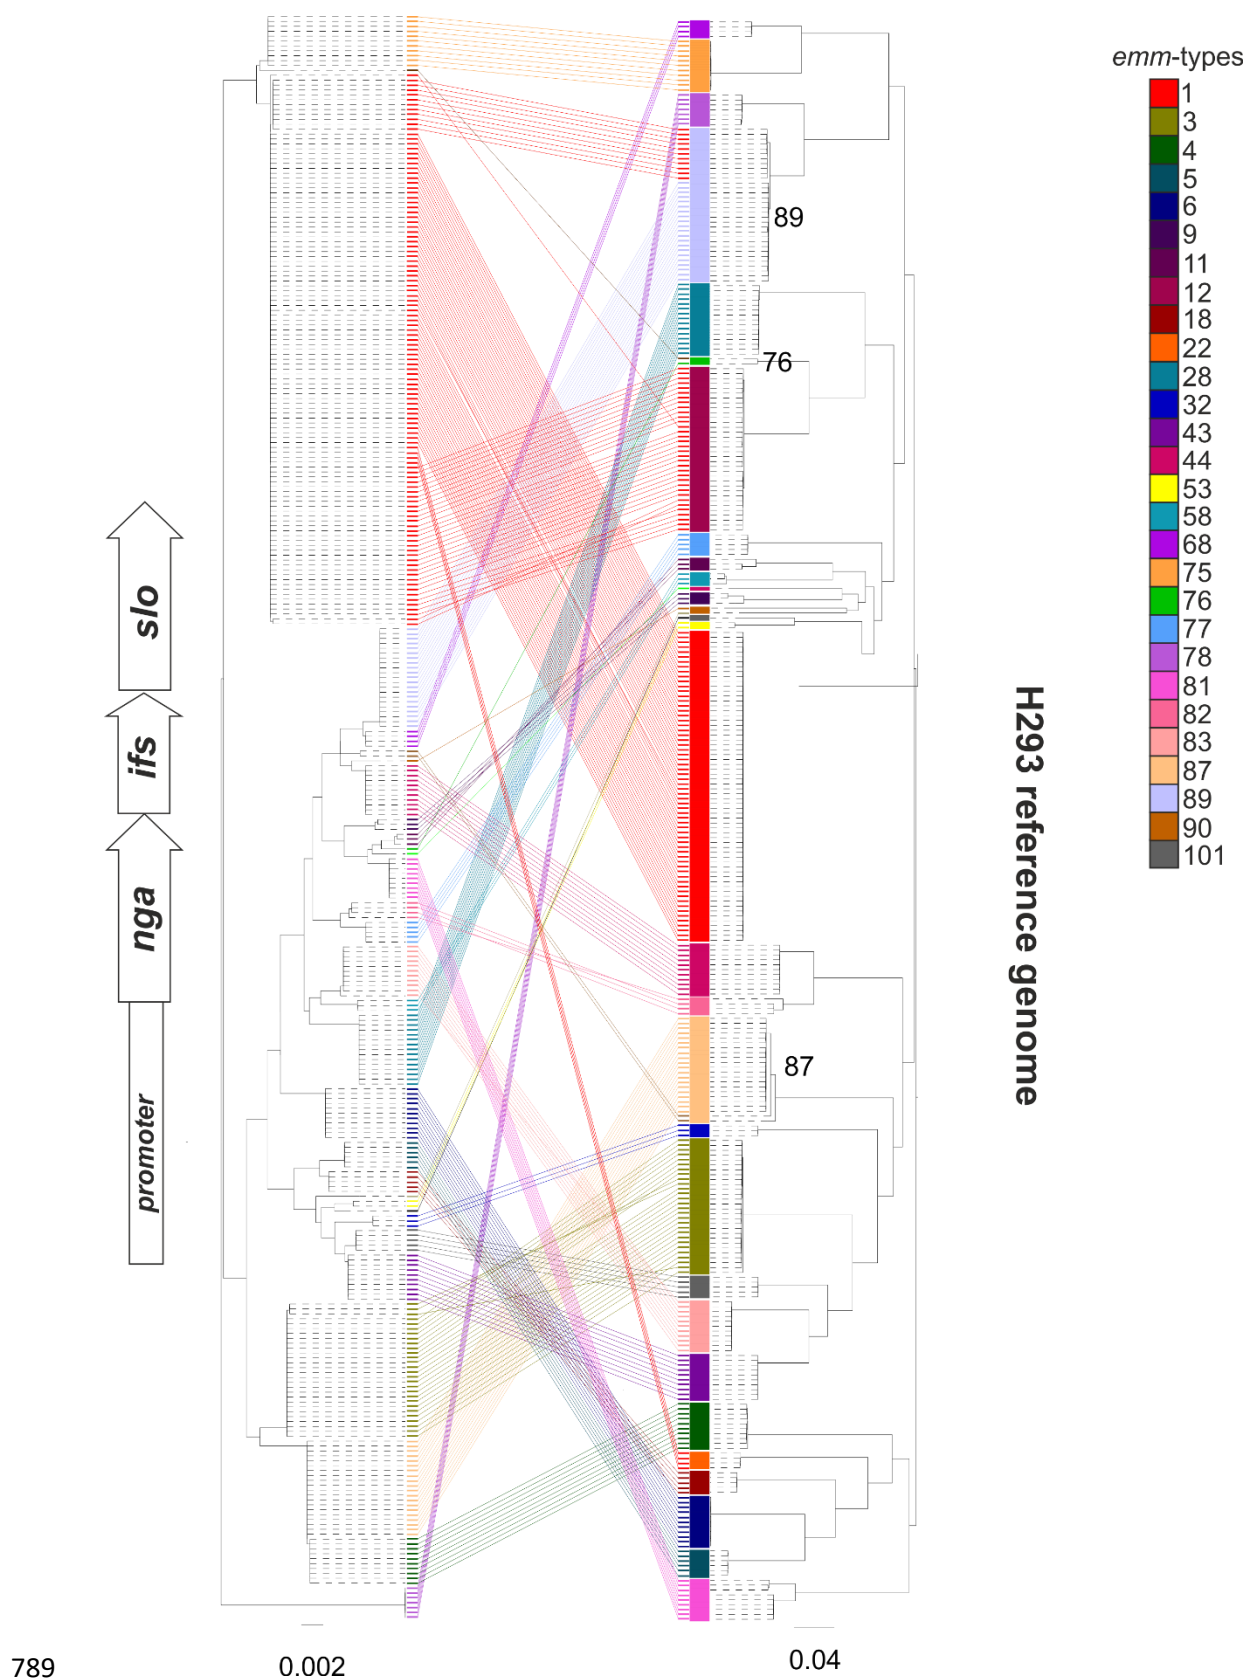

790 **Figure 2. Comparison of the variation within the *P-nga-ifs-slo* region and core**  
791 **chromosome.** A maximum likelihood phylogenetic tree was constructed from SNPs

792 extracted from an alignment of the *nga-ifs-slo* locus and associated upstream region to  
793 include the promoter (*P-nga-ifs-slo*) extracted from *de novo* assemblies of 344 BSAC *S.*  
794 *pyogenes* (Left tree). This was compared to the phylogenetic tree constructed using SNPs  
795 across the entire genome after mapping to the H293 reference genome (Right tree). Only  
796 *emm* genotypes represented by two or more isolates were included. Coloured blocks on the  
797 right tree represent *emm*-type. Variants of the *P-nga-ifs-slo* are of the same colour if unique to  
798 that genotype. The *P-nga-ifs-slo* variant found in *emm1* (red) was common to other genotypes  
799 *emm12*, *emm22* and some *emm89*. The genotypes *emm76*, *emm87* and *emm89* are indicated  
800 as they are linked to more than one variant of *P-nga-ifs-slo*. Scale bar represents substitution  
801 per site.

802

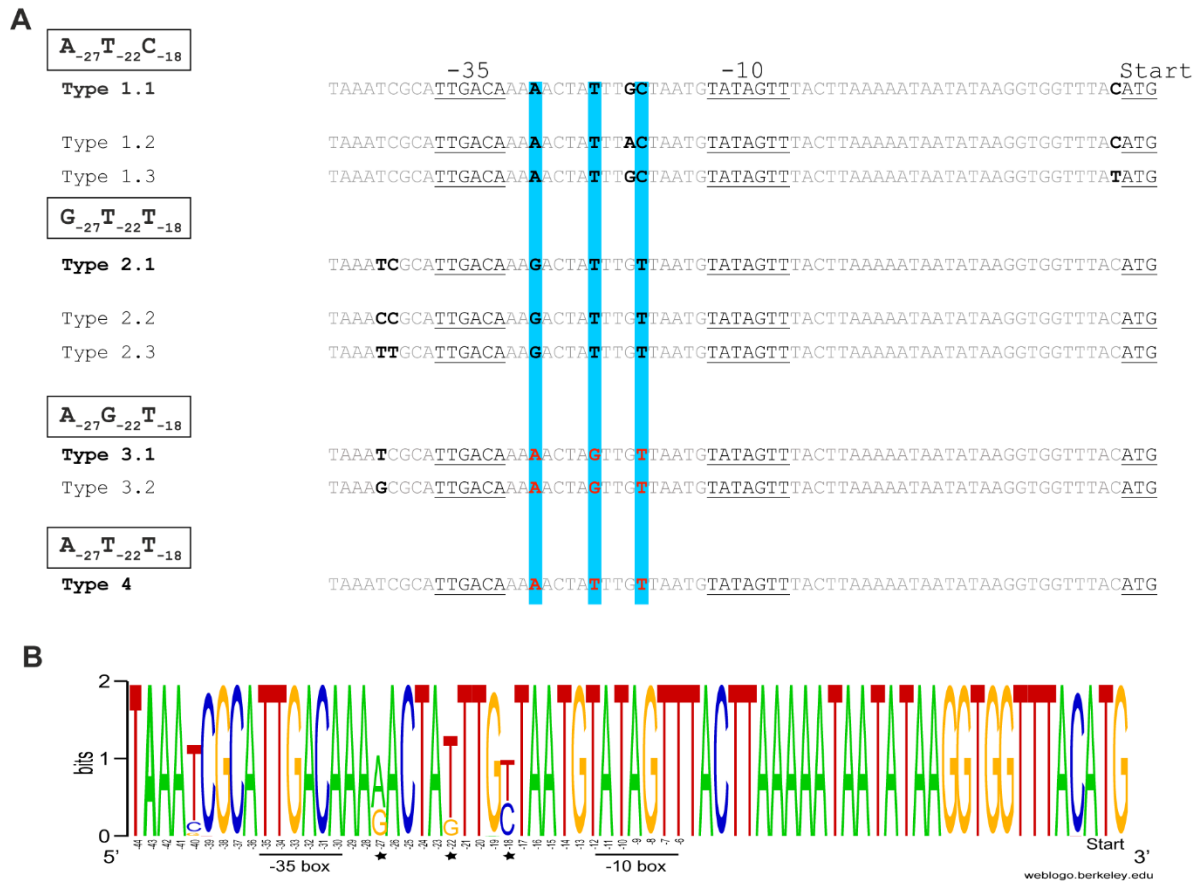

803

804 **Figure 3. Variants of the *nga-ifs-slo* promoter.** (A) The three key residues predicted to  
 805 influence promoter activity are highlighted blue with those associated with high activity in  
 806 red. We identified four combinations of these residues (four promoter types) with subtype  
 807 variants differing in residues other than -27, -22 and -18 (residue positions relative to the  
 808 underlined -35 and -10 regions) in the predicted 67bp promoter region (9). The combination  
 809 of  $A_{-27}T_{-22}C_{-18}$  subtype 1.1 in historical *emm1* and  $G_{-27}T_{-22}T_{-18}$  subtype 2.1 in older *emm89*  
 810 have been shown to be associated with low level promoter activity.  $A_{-27}G_{-22}T_{-18}$  subtype 3.1  
 811 promoter in modern *emm1* and emergent variant *emm89* has been shown to have high  
 812 activity.  $A_{-27}T_{-22}T_{-18}$  subtype 4 promoter has also been shown to have high activity in *emm28*  
 813 (15). Subtypes 1.2, 1.3 and 2.3 were restricted to *emm9*, *emm88* and *emm32* strains  
 814 respectively. (B) Weblogo representation of the variability in the 67bp promoter region of  
 815 *nga/ifs/slo* within the 54 different *emm*-types. Key residues -27, -22, -18 are highlighted (star)

816 and their positions are relative to the -35 and -10 boxes. Figure generated using

817 [weblogo.berkeley.edu](http://weblogo.berkeley.edu).

818

819

820

821



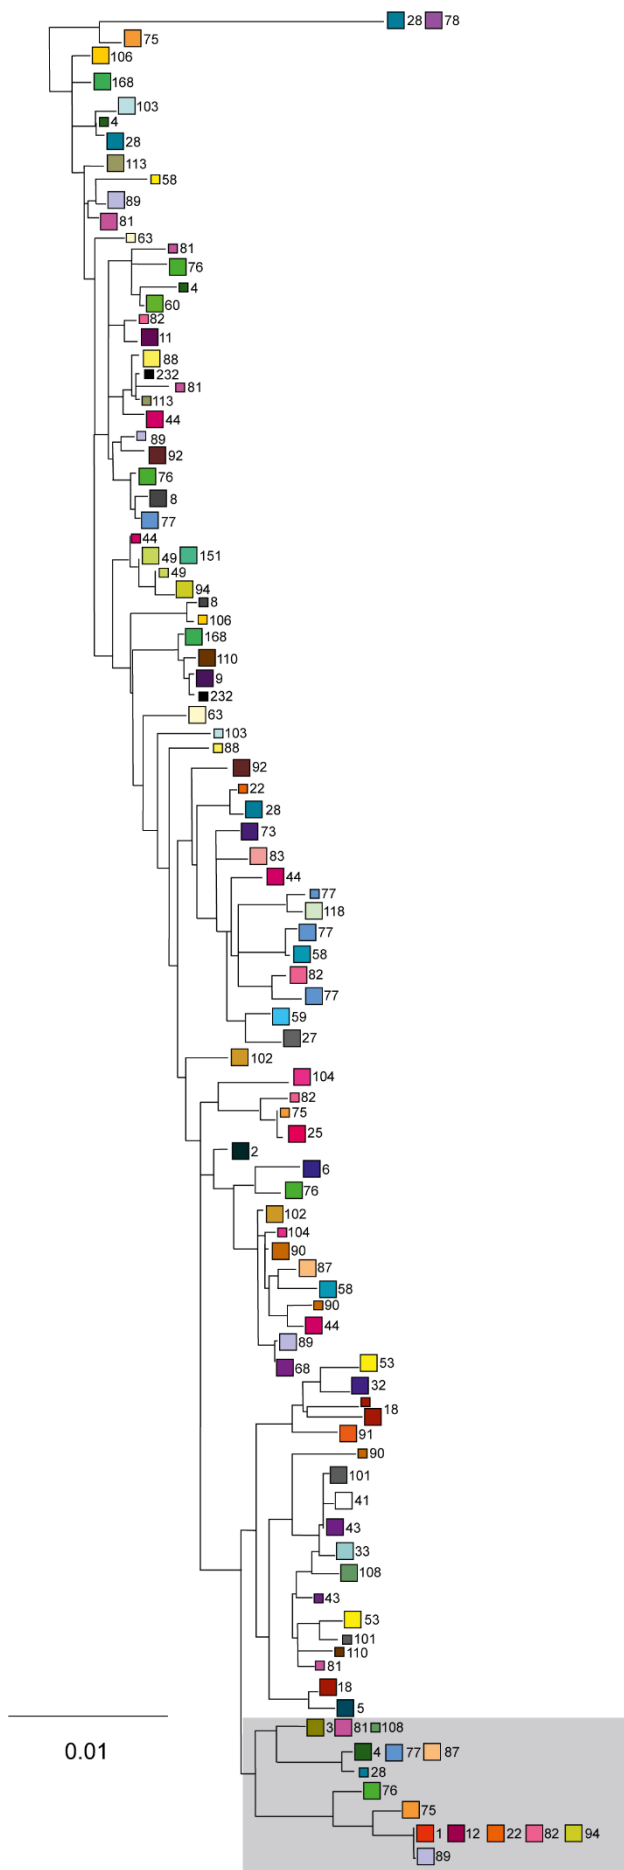

823 **Figure 4. Variants of *P-nga-ifs-slo* within *emm* genotypes.** The *P-nga-ifs-slo* was extracted  
824 from 5271 assembled genomes and aligned for SNP extraction, and these used for maximum  
825 likelihood midpoint-rooted phylogenetic tree construction. Squares represent multiple  
826 identical sequences (larger squares) or single sequences (smaller squares) of individual *emm*-  
827 types. The *emm*-type is given next to each square. Shaded region; high activity cluster. Scale  
828 represents substitutions per sites.

829

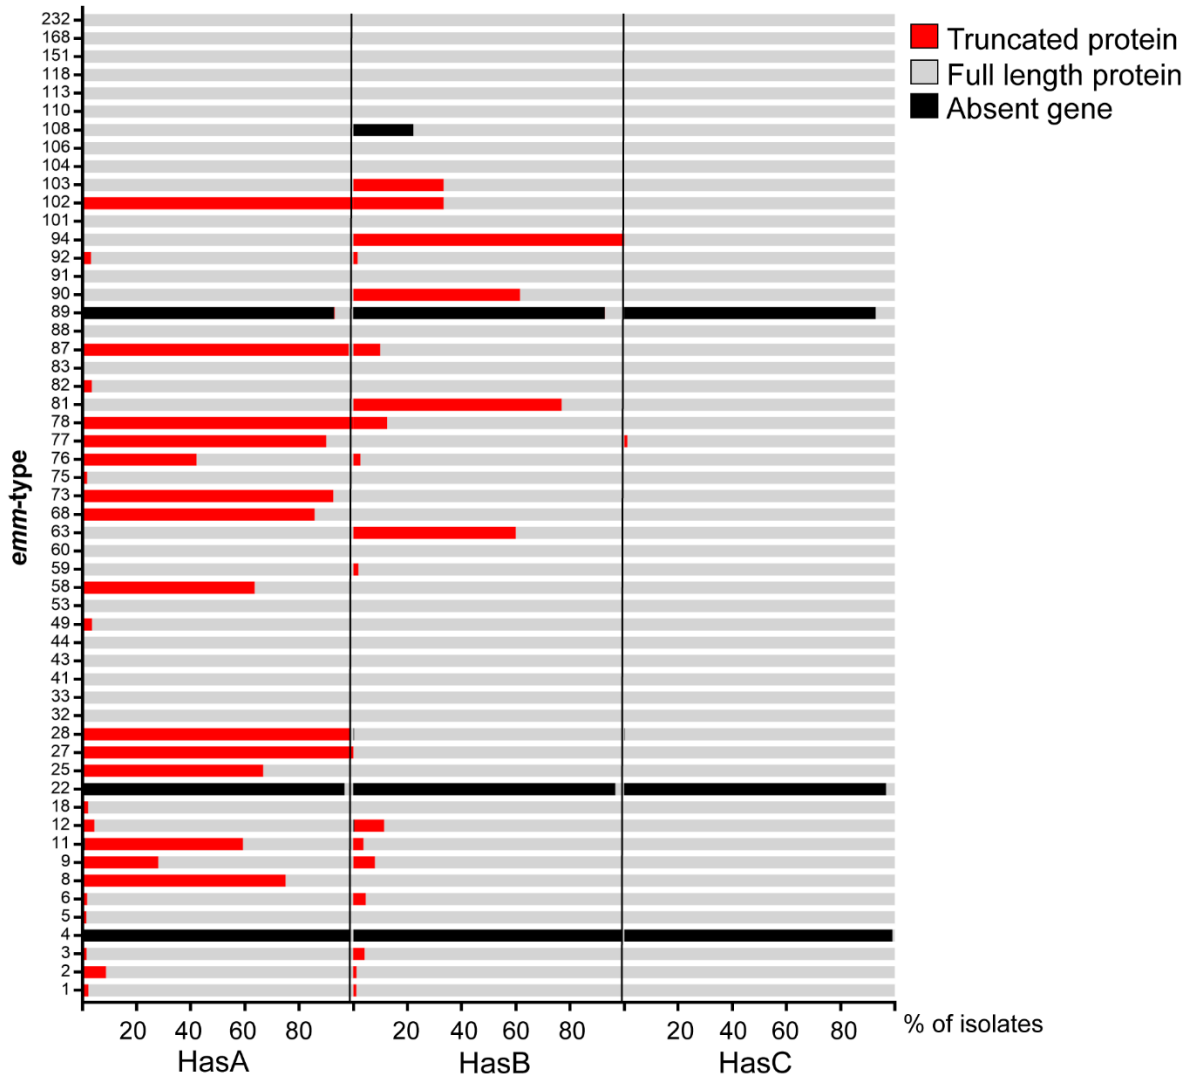

830

831

**Figure 5. Non-functional mutations within the capsule locus genes.** The *hasABC* genes

832

were extracted from the assembled genomes of BSAC, CUH, PHE-2015/15, and ABCs-2015

833

isolate collections and polymorphisms or indels leading to nonsense mutations and premature

834

stop codons were identified, as well as gene absence. The percentage of isolates with full

835

length (grey), truncated (red) or absent (black) HasA, HasB or HasC is depicted for each of

836

the 54 *emm*-types. *emm*-types with fewer than 3 isolates were excluded. N = 5271 isolates

837

shown. Mutations in *hasA* were detected in more than 50% of isolates belonging to genotypes

838

*emm8* (n=3/4), *emm11* (n=63/108), *emm25* (n=2/3), *emm27* (n=3/3), *emm28* (n=358/363),

839

*emm58* (n=21/33), *emm68* (n=12/14), *emm73* (n=25/27), *emm77* (n=72/80), *emm78* (n=8/8),

840

*emm87* (n=119/121) and *emm102* (n=6/6). Mutations in *hasB* were detected in 100% of

841 *emm94* isolates (n=54/54) and 60-77% of *emm63* (n=3/5), *emm81* (n=50/65) and *emm90*

842 (n=16/26) isolates.

843

844

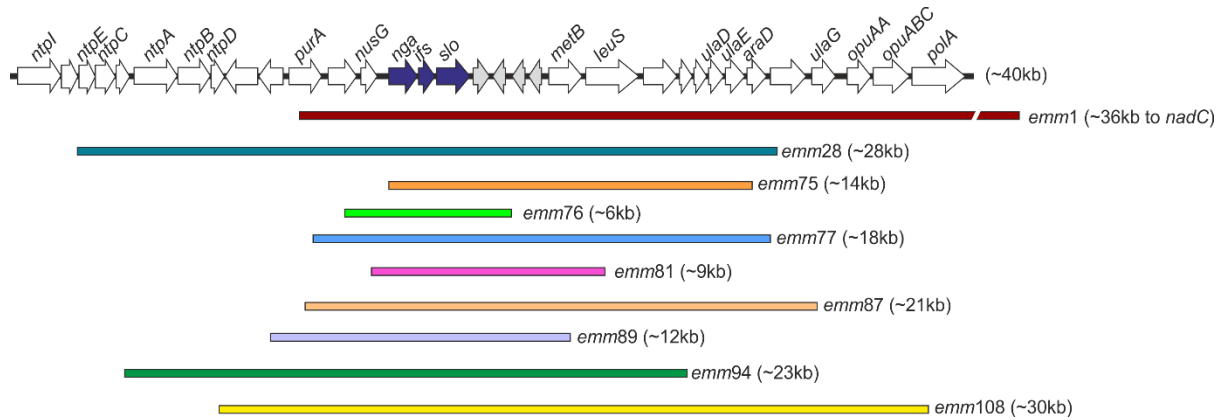

845

846

847 **Figure 6. Regions of recombination spanning the P-*nga-ifs-slo* locus.** Recombination

848 across the *nga*, *ifs* and *slo* genes (blue arrows) was identified in eight genotypes in addition to

849 the previously described *emm1* and *emm89*. Length of recombination, predicted by SNP

850 cluster analysis, ranged from ~6kb to 36kb. With the exception of *emm75*, all regions also

851 encompassed the promoter of *nga-ifs-slo*. All regions are shown relative to a ~40kb region

852 within the reference genome H293 and genes within this region are depicted as arrows.

853 Recombination in *emm1* extended beyond that depicted here and is shown as a broken line.

854

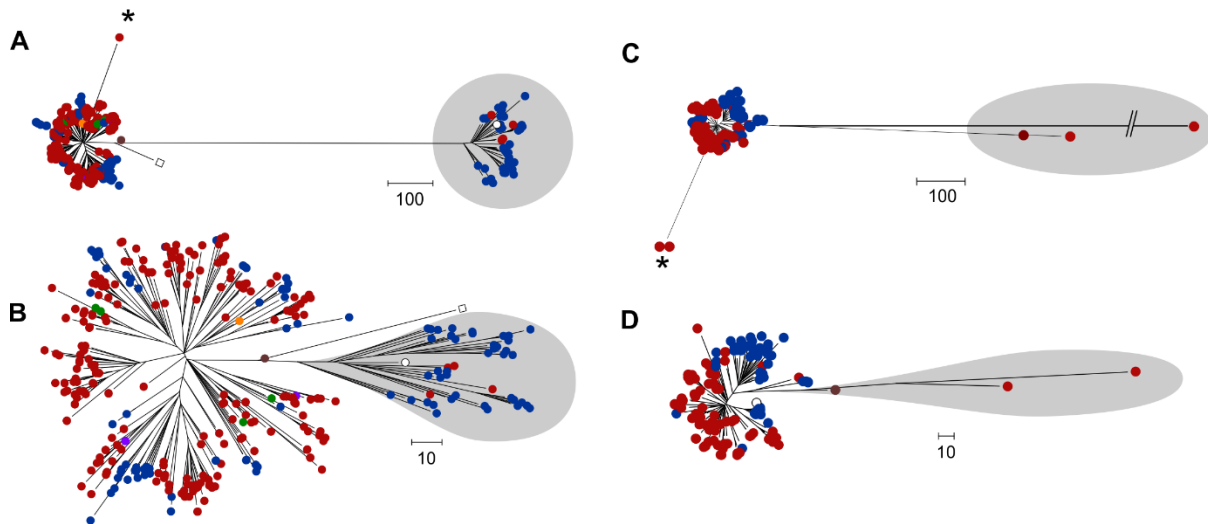

855

856 **Figure 7. Recombination within the *emm28* and *emm87* populations.** (A) Maximum  
857 likelihood phylogeny constructed with core SNPs following mapping of all available *emm28*  
858 genome data to the *emm28* MGAS6180 reference genome (white square) (18). Modern UK  
859 isolates (red circles); BSAC (n=15), CUH (n=13 (11)) and PHE-2014/15 (n=240 (12, 13)),  
860 one historical English isolate from 1938 (brown circle). North American isolates (blue  
861 circles); ABCs-2015 (n=95 (14)), Canada (2011-2013, n=4 (42)), and completed genome  
862 strain HarveyGAS (USA, 2017 (43)). Other isolates; Lebanon (n=1, orange circle (44)),  
863 Australia (n=5, green circle (45)), France (STAB10015 (46), M28PF1 (47), purple circles).  
864 Two lineages of *emm28* were identified, one clustering with MGAS6180 (white square) and  
865 the other (shaded grey) clustering with MEW123 (2012 USA (19), white circle). (B) Regions  
866 of recombination were then identified within the *emm28* genome alignment and removed  
867 before reconstructing the phylogenetic tree (C) Maximum likelihood phylogeny constructed  
868 with core SNPs following mapping of all available *emm87* genome sequence data to the  
869 reference *emm87* strain NGAS743 (Canada, white circle (48)). UK isolates (red circles);  
870 BSAC (2001-2011, n=22), CUH (2008, n=1 (11)), PHE-2014/15 (n=64, (12, 13)). North  
871 American isolates (blue circles); ABCs-2015 (n=26, (14)), Canada (n=26, (48)), Texas  
872 Children's Hospital (2012-2016, n=27, (49)). Three isolates (shaded grey) were distinct from

873 the main population. The branch was shortened for one isolate for presentation purposes. **(D)**  
874 Regions of recombination were identified within the *emm87* genome alignment and removed  
875 before reconstructing the phylogenetic tree. Isolates indicated by \* in both *emm28* and  
876 *emm87* populations were predicted to have undergone recombination in regions surrounding  
877 the *hasABC* locus. Scale bar represents single nucleotide polymorphisms. PHE-2014/15  
878 *emm28* isolates GASEMM1261, GASEMM2648, GASEMM1396 and GASEMM1353 were  
879 removed for presentation purposes as they represented highly divergent lineages.  
880

881

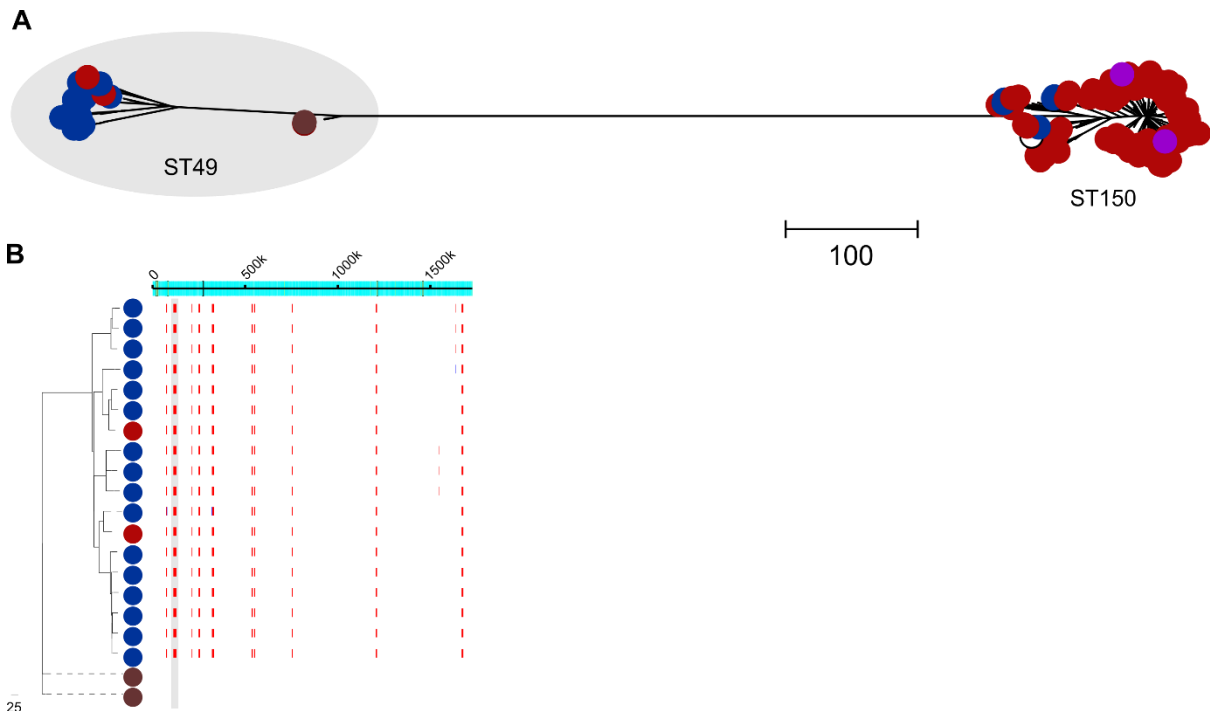

882

883 **Figure 8. Two lineages within *emm75*.** (A) Maximum likelihood phylogeny constructed  
884 with core SNPs following mapping of all available *emm75* genome sequence data to the  
885 French strain STAB090229 (white circle) (50). Modern UK collections (red circles); BSAC  
886 (n=11), CUH (n=6 (11)), PHE-2014/15 (n = 141, (12, 13)) and two English historical isolates  
887 (brown circles) from 1937/1938. North American isolates (blue circles); ABCs-2015 (n=20,  
888 (14)), NGAS344 and NGAS604 from Canada 2011/2012 (42). French strains (purple circles);  
889 STAB120304 (2012) and STAB14018 (2014). Two lineages were identified, generally  
890 characterised by the MLST; ST49 (shaded grey) or ST150 (with minor MSLT variants  
891 ST788, ST851, ST861 within these lineages). (B) Gubbins analysis identified ten regions of  
892 predicted recombination (red lines) in all modern ST49 compared to historical 1930s ST49  
893 across the genome (indicated across the top). One region included *P-nga-ifs-slo* (shaded  
894 grey). Scale bars represent single nucleotide polymorphisms. One PHE-2014/15 isolates  
895 (GASEMM1722) was excluded for presentation purposes as it was highly divergent from the  
896 rest of the population.



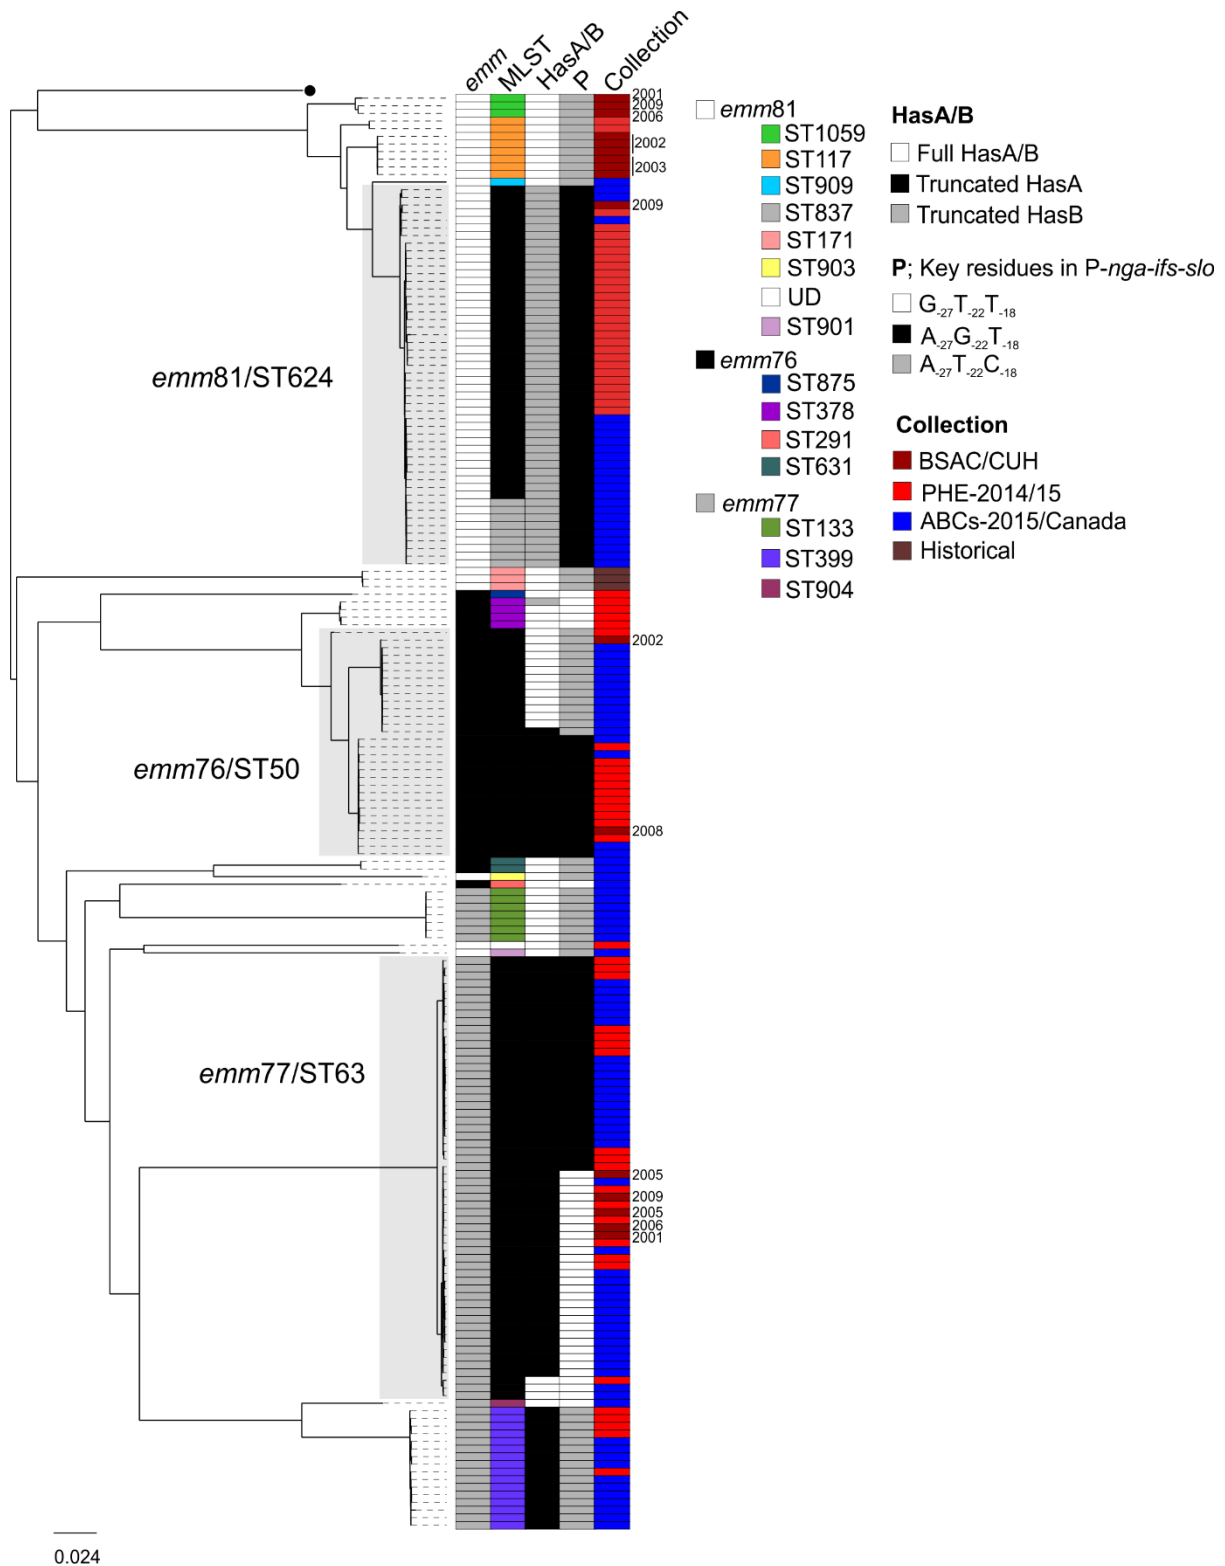

898 **Figure 9. Variants of *P-nga-ifs-slo* and capsule mutations associated with lineages of**  
 899 ***emm76*, *emm77* and *emm81*.** Maximum likelihood phylogeny identified multiple MLST  
 900 lineages within the populations of *emm76*, *emm77* and *emm81* (STs provided in the key, UD;

901 undetermined). Major ST lineages are indicated and shaded grey. All *emm81* isolates were  
902 predicted to express full length HasA but the ST624, and minor (single base change in *recP*)  
903 ST variant ST837, carry a mutation within *hasB* leading to a truncated HasB. For *emm76* and  
904 *emm77*, mutations were detected in *hasA*. We also identified variants of P-*nga-ifs-slo*  
905 associated with one of three combinations of key promoter residues including the high  
906 activity associated A<sub>-27</sub>G-22T<sub>-18</sub>. Collection indicates either BSAC or CUH (dark red), PHE-  
907 2014/15 isolates (red), North America (blue) or English historical (brown). Dates for BSAC  
908 isolates and CUH are shown; other isolates were from 2014/2015 or 1930s (historical).  
909 *emm76*; n=2 BSAC, n=18 PHE-2014/15 (12, 13), n=18 ABCs-2015 (14). *Emm77*; n=5  
910 BSAC, n=21 PHE-2014/15 (12, 13), n=54 ABCs-2015 (14), n=2 Canada (date unknown)  
911 (42). *emm81*; n=9 BSAC, n=1 CUH (11), n=29 PHE-2014/15 (12, 13), n=26 ABCs-2015  
912 (14), n=3 historical 1930s. All sequence data was mapped to the reference strain H293 (black  
913 circle). Scale bar represent substitutions per site.

914

915 **Supplementary Figures**

916

917

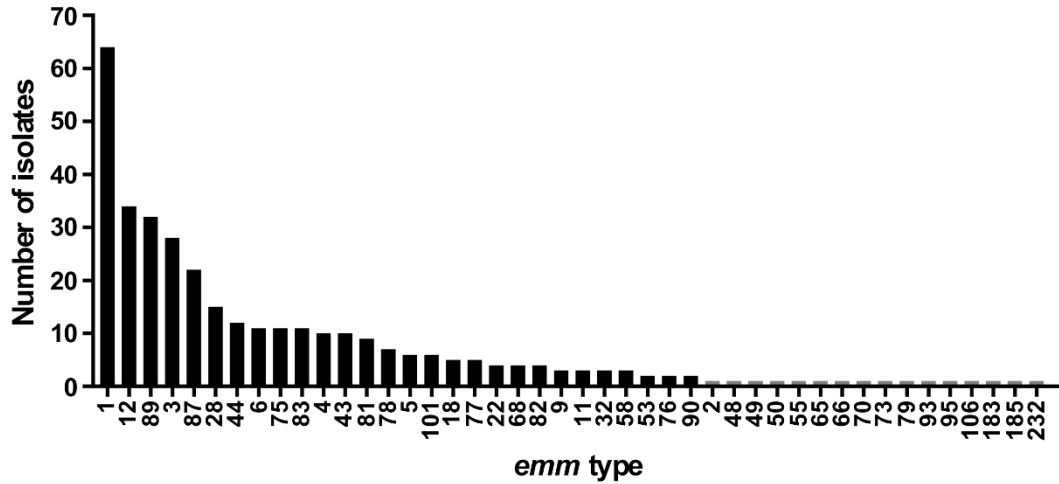

918

919 **Supplementary Figure 1.** Number of isolates per *emm*-type in the BSAC collection. Forty-

920 four different genotypes were identified within the collection but 16 were represented by

921 single isolates (grey bars). Total number of isolates was 344.

922

923

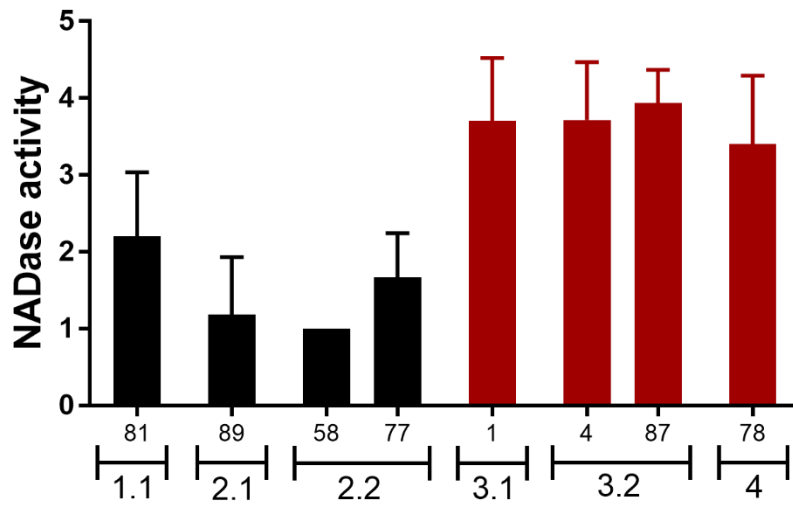

924

925

926 **Supplementary Figure 2. NADase activity of different promoter subtypes.** The activity of

927 NADase was measured in culture supernatant of BSAC isolates representing different

928 promoter subtypes with predicted low (black) or high (red) activity. A<sub>-27</sub>T<sub>-22</sub>C<sub>-18</sub> subtype 1.1

929 promoter has low activity in *emm81* isolates, consistent with previous findings of this

930 promoter in historical *emm1*. G<sub>-27</sub>T<sub>-22</sub>T<sub>-18</sub> subtype 2.1 had low activity in older *emm89*, also

931 consistent with previous findings, and subtype 2.2 in *emm58* and *emm77* also had low

932 activity, as predicted despite the additional base change at -40bp. High activity of A<sub>-27</sub>G<sub>-22</sub>T<sub>-18</sub>

933 subtype 3.1 was confirmed in *emm1* and subtype 3.2 in *emm4* and *emm87* also had high

934 activity, also supporting a null effect of the base change at -40bp. A<sub>-27</sub>T<sub>-22</sub>T<sub>-18</sub> subtype 4

935 promoter in *emm78* had high activity. Isolates with mutations in regulators *covR/S* or *rocA*

936 were excluded as they influence the expression of *nga*. Data represent mean +SD of *emm1*;

937 n=10, *emm89*; n=11, *emm58*; n=3, *emm77*; n=3, *emm4*; n=7, *emm87*; n=17, *emm78*; n=5,

938 *emm81*; n=5.

939

940

941

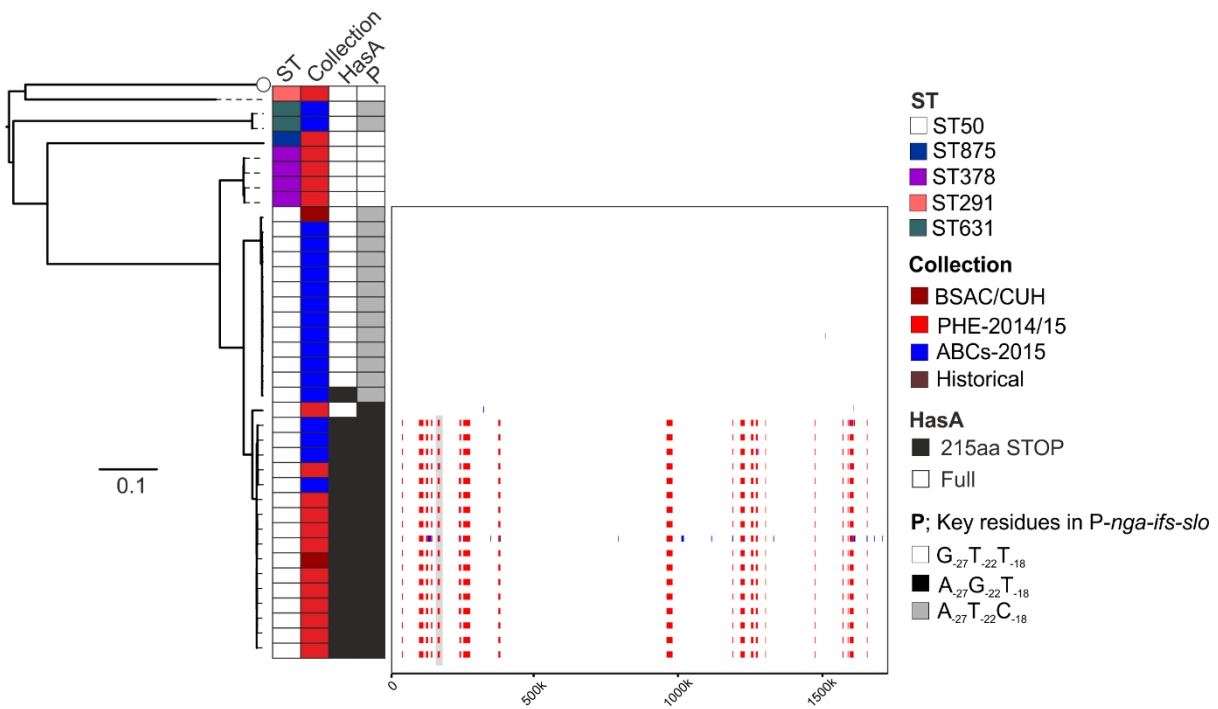

942

943

944 **Supplementary Figure 3. Recombination within ST50 *emm76*.** All sequence data for

945 *emm76* (n=38) were mapped to the reference strain H293 (white circle). Majority of isolates

946 were ST50 and within this ST were two sub-lineages. Recombination analysis (boxed region)

947 of ST50 isolates identified 19 regions of recombination across the genome in all isolates (red

948 vertical lines) belonging to the lower sub-lineage compared to the top sub-lineage. One of

949 these regions (highlighted grey) surrounded the *P-nfa-ifs-slo* locus conferring the high

950 activity associated promoter with residues A<sub>-27</sub>G<sub>-22</sub>T<sub>-18</sub> to the lower sub-lineage compared to

951 low activity A<sub>-27</sub>T<sub>-22</sub>C<sub>-18</sub> in the top sub-lineage. Scale bar represents substitutions per site.

952 Scale on boxed region represents position in the H293 genome.

953

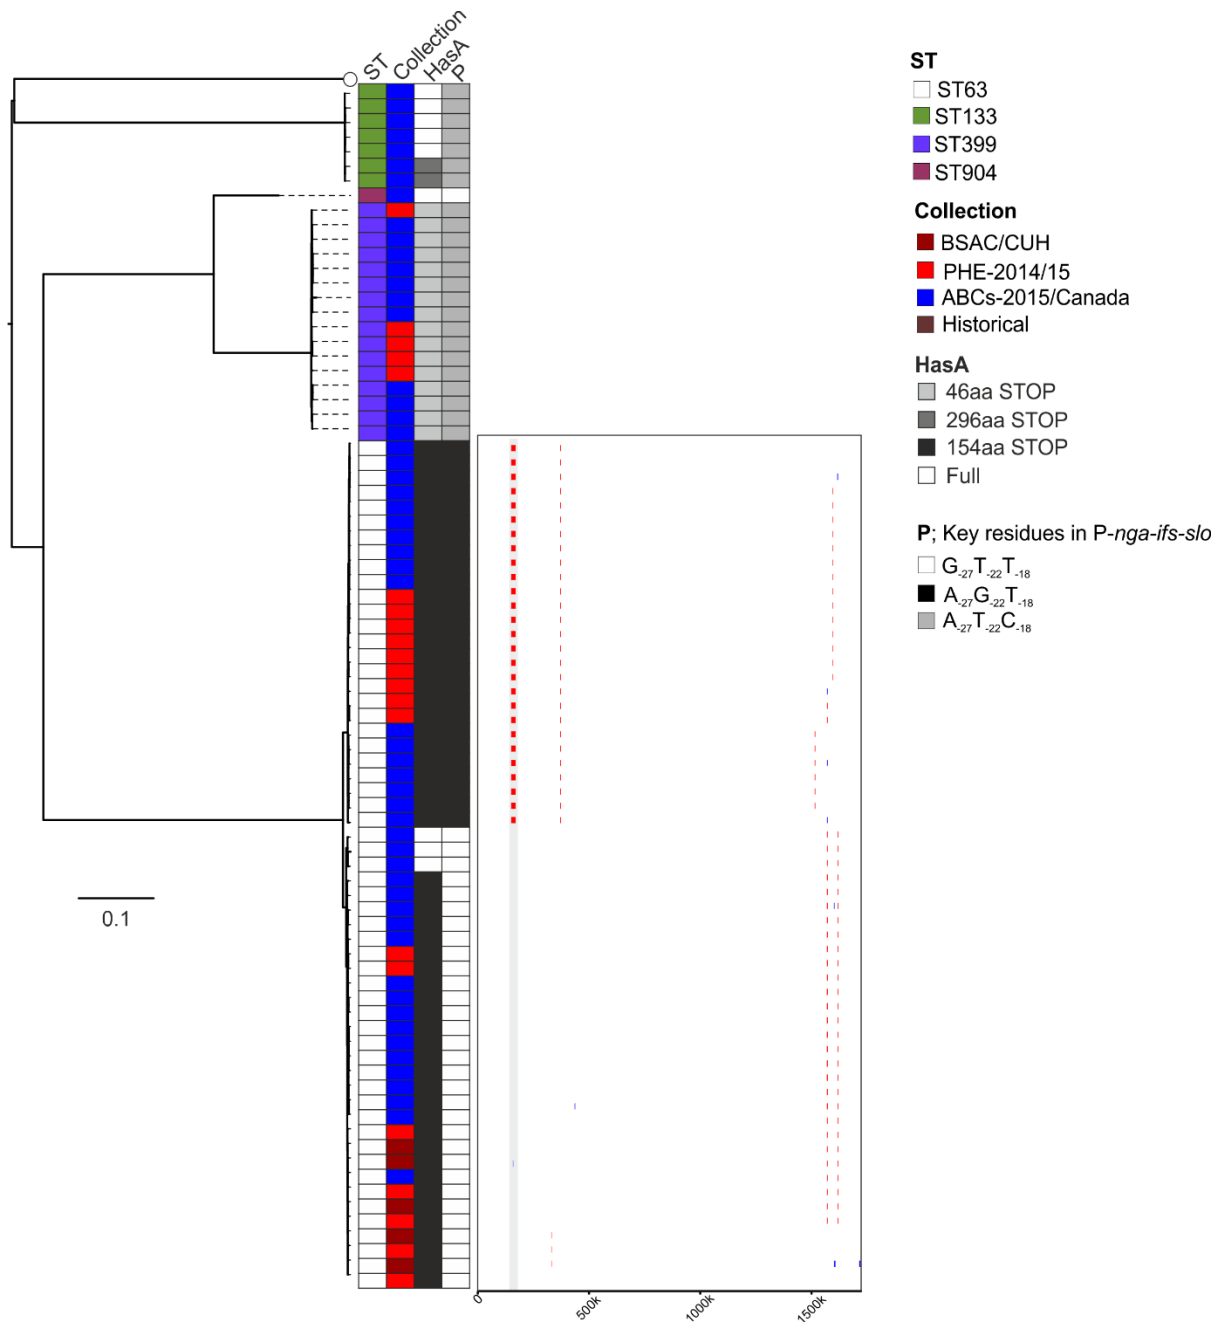

954

955

956 **Supplementary Figure 4. Recombination within ST63 *emm77*.** All sequence data for

957 *emm77* (n=82) were mapped to the reference strain H293 (white circle). Majority of isolates

958 were ST63 and within this ST were two sub-lineages. Recombination analysis (boxed region)

959 of ST63 isolates identified 2 regions of recombination across the genome in all isolates (red

960 vertical lines) belonging to the top sub-lineage compared to the lower sub-lineage. One of

961 these regions (highlighted grey) surrounded the *P-nga-ifs-slo* locus conferring the high

962 activity associated promoter with residues A<sub>-27</sub>G<sub>-22</sub>T<sub>-18</sub> to the lower sub-lineage compared to

963 low activity G<sub>-27</sub>T<sub>-22</sub>T<sub>-18</sub> in the top sub-lineage. Scale bar represents substitutions per site.

964 Scale on boxed region represents position in the H293 genome.

965

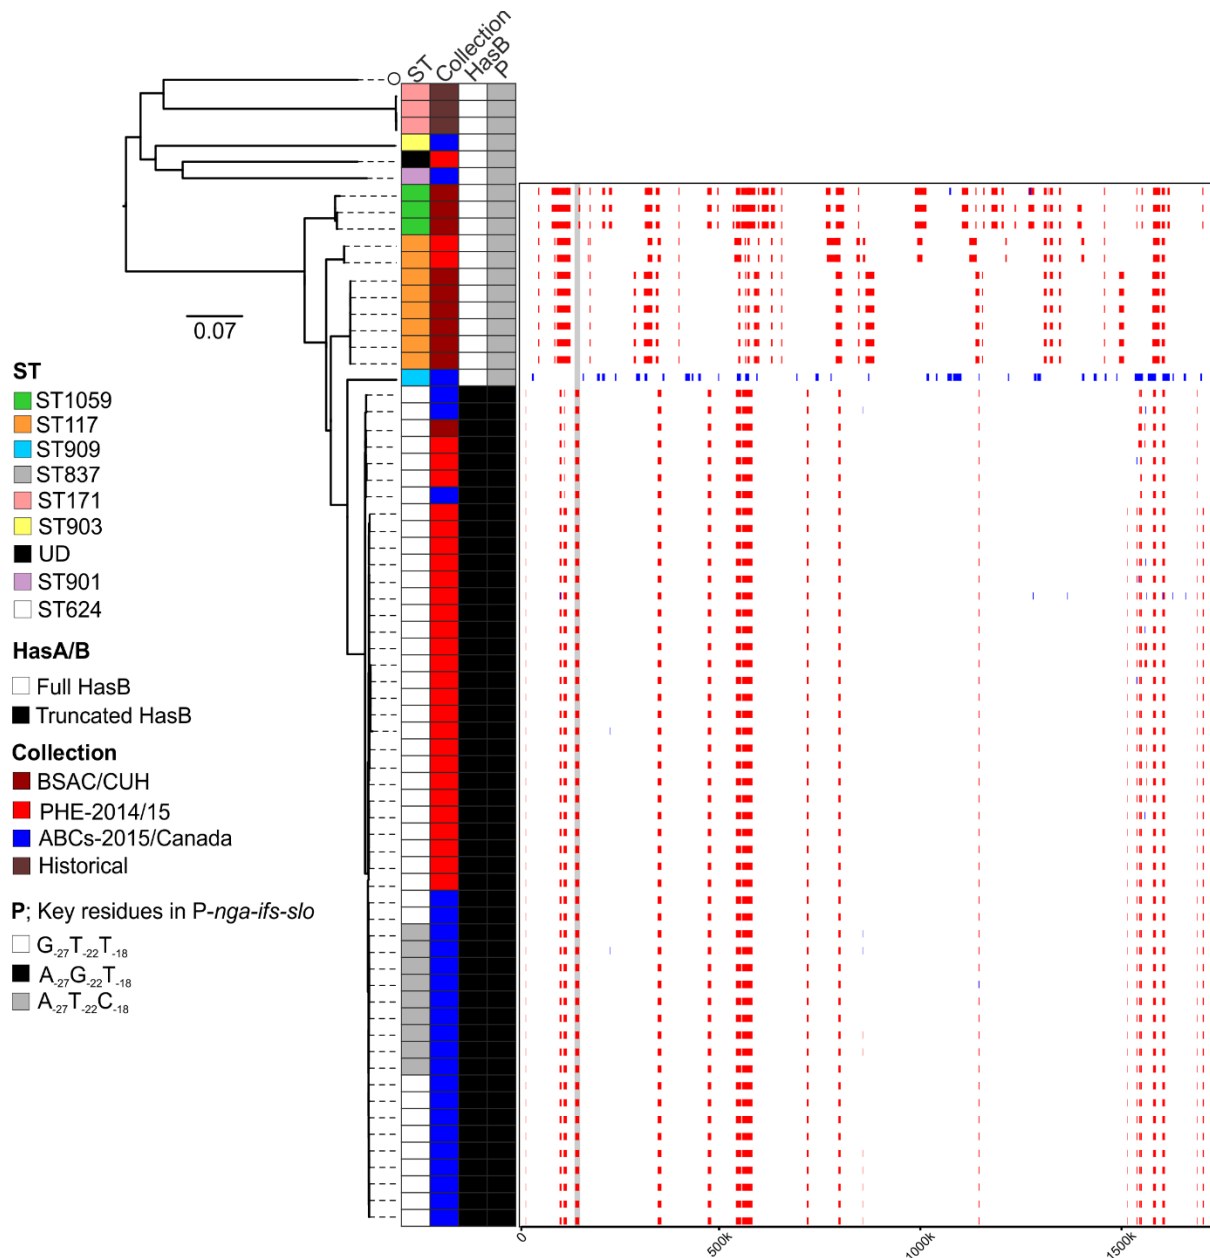

966

967

968 **Supplementary Figure 5. Recombination within *emm81***

969 (n=68) were mapped to the reference strain H293 (white circle). Majority of isolates were

970 ST624. Recombination analysis (boxed region) of ST624 isolates and closely related ST1059,

971 ST117, ST909 and ST837 identified patterns of recombination across the genome in all

972 isolates (red vertical lines, or blue vertical lines if unique to a single isolate). One of these

973 regions (highlighted grey) surrounded the *P-nfa-ifs-slo* locus conferring the high activity

974 associated promoter with residues A<sub>-27</sub>G<sub>-22</sub>T<sub>-18</sub> to the ST624/ST837 population compared to



975 low activity G<sub>-27</sub>T<sub>-22</sub>T<sub>-18</sub> in all other isolates. Scale bar represents substitutions per site. Scale

976 on boxed region represents position in the H293 genome.

977

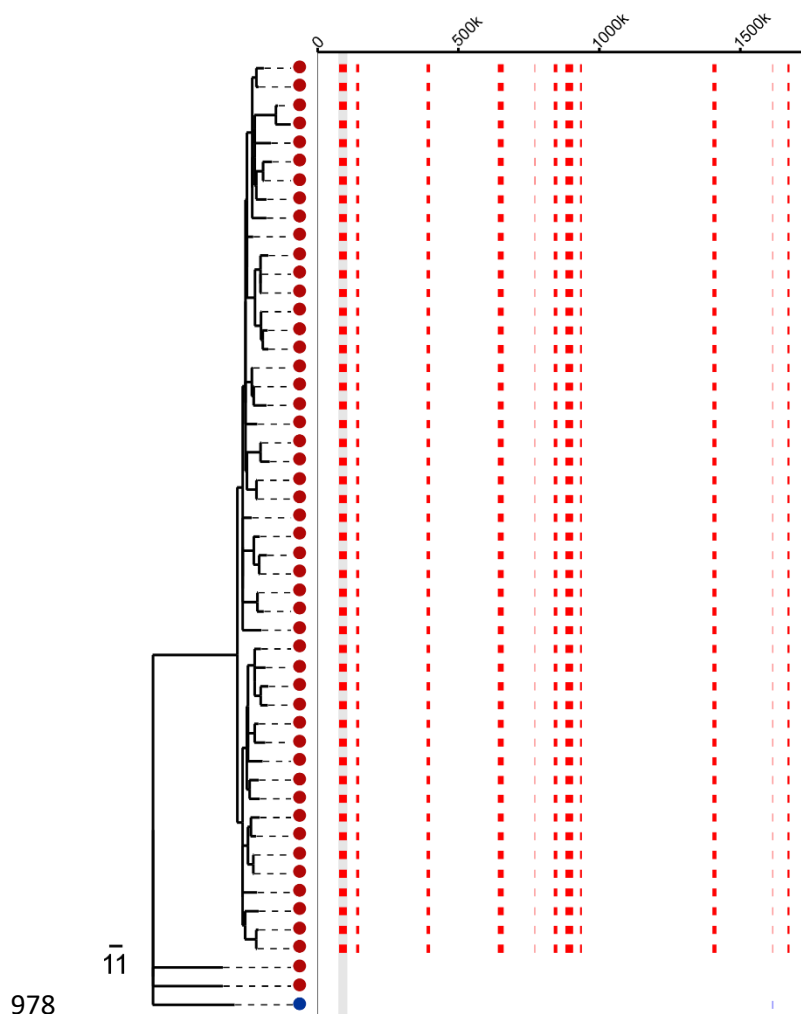

978

979 **Supplementary Figure 6. Recombination in *emm94*.** In the 2014/2015 UK *emm94*

980 population, the majority (n=51) form a lineage separate from two 2014/2015 UK isolates and

981 the single 2015 USA isolate. SNP clustering analysis predicted 11 regions of recombination

982 (red lines) in all the lineage associated isolates compared to the three other isolates. One of

983 these regions (highlighted in grey) encompassed the *P-nga-ifs-slo* region. Scale bar represents

984 SNPs.

985

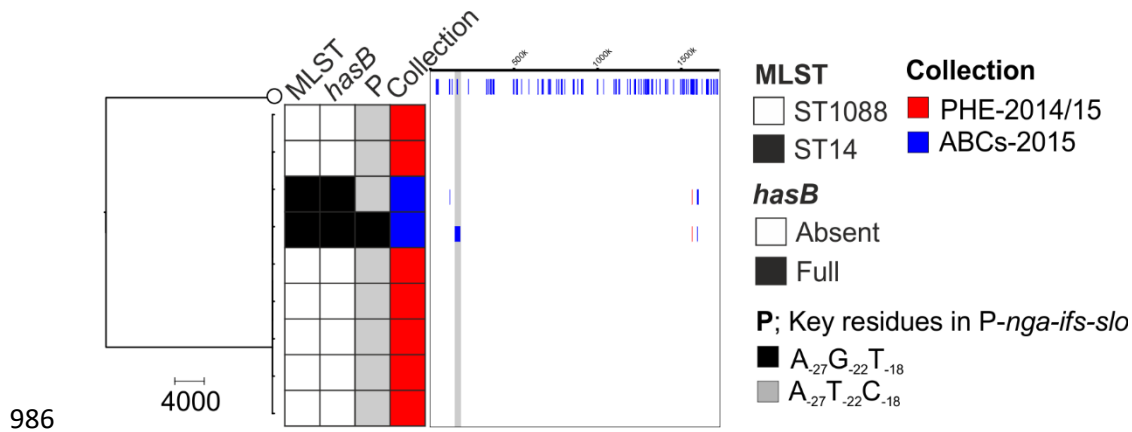

**Supplementary Figure 7. Recombination in *emm108* around *P-nga-ifs-slo*.** Isolates of *emm108* from the ABCs-2015 (blue) collection were of a different MLST (ST14) compared to PHE-2014/15 (ST1088). The *hasB* gene was absent in the genomes of both ABCs-2015 isolates and one had undergone recombination surrounding the *P-nga-ifs-slo* locus (shaded grey), as predicted by SNP cluster analysis (shown on the right). Blue lines; predicted recombination unique to a single genome. Sequence data were mapped to the reference strain H293, also used as an outgroup for SNP cluster analysis. Scale bar represents SNPs.

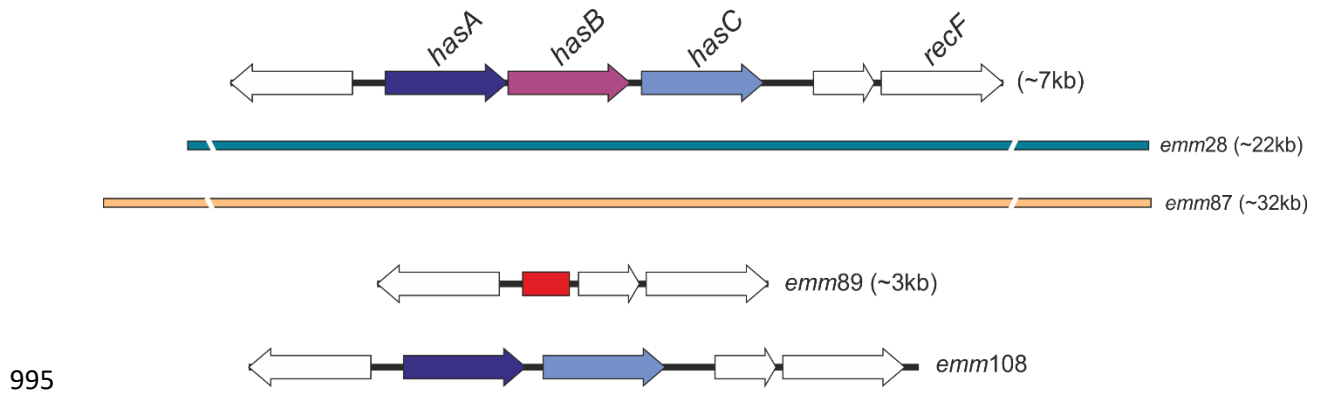

996 **Supplementary Figure 8. Regions of recombination spanning the capsule locus.**

997 Recombination across the *hasA*, *hasB* and *hasC* genes was identified in two genotypes in  
998 addition to the previously described *emm89*. Length of recombination, predicted by SNP  
999 cluster analysis, ranges from ~3kb to 32kb. Recombination within *emm89* resulted in the loss  
1000 of all three genes and the gain of a 150bp region (red). In *emm108*, the *hasB* gene was lost  
1001 but this may be through recombination within the chromosome rather than recombination. All  
1002 regions are shown relative to the reference genome H293 and genes within this region are  
1003 depicted as arrows. Recombination in *emm28* and *emm87* extended beyond the region  
1004 depicted and shown as broken lines.

1005

1006 **Supplementary Tables**

1007 **Supplementary Table 1 – Details of BSAC isolates and antimicrobial sensitivity testing**

1008 Excel File- Supplementary\_Table\_1.xlsx

1009 **Supplementary Table 2 – Details of all isolates with assembly statistics, capsule gene mutations and *nga/ifs/slo* promoter variants.**

1011 Excel File – Supplementary\_Table\_2.xlsx

1012

1013 **Supplementary Table 3. Reference genomes used for mapping to in this study and**  
1014 **excluded prophage regions**

| <b>Reference strain</b> | <b><i>emm</i> type</b> | <b>Prophage locations</b>                                                                                     |
|-------------------------|------------------------|---------------------------------------------------------------------------------------------------------------|
| H293                    | 89                     | None                                                                                                          |
| MGAS6180                | 28                     | 986212-1032479<br>1226909-1269223<br>1807177-1821524<br>1845845-1857621<br>1081040-1092149<br>1286346-1322672 |
| STAB090229              | 75                     | 723790-761364<br>1138154-1180947<br>1473588-1512859                                                           |
| NGAS743                 | 87                     | 547772-585345<br>709624-756401<br>1199244-1242181<br>1253797-1293056                                          |

1015

1016

1017

1018

1019

1020
